1 **The SERM/SERD Bazedoxifene Disrupts ESR1 Helix 12 to Overcome Acquired Hormone**  
2 **Resistance in Breast Cancer Cells**

3 Sean W. Fanning<sup>1</sup>, Rinath Jeselsohn<sup>2,3</sup>, Venkatasubramanian Dharmarajan<sup>4</sup>, Christopher G. Mayne<sup>5,6</sup>,  
4 Mostafa Karimi<sup>7</sup>, Gilles Buchwalter<sup>2</sup>, Rene Houtman<sup>8</sup>, Weiyi Toy<sup>9</sup>, Colin E. Fowler<sup>1</sup>, Muriel Lainé<sup>1</sup>,  
5 Kathryn E Carlson<sup>5</sup>, Teresa A. Martin<sup>5</sup>, Jason Nowak<sup>4</sup>, Jerome Nwachukwu<sup>4</sup>, David J. Hosfield<sup>1</sup>, Sarat  
6 Chandarlapaty<sup>9</sup>, Emad Tajkhorshid<sup>6</sup>, Kendall W. Nettles<sup>4</sup>, Patrick R. Griffin<sup>4</sup>, Yang Shen<sup>7</sup>, John A.  
7 Katzenellenbogen<sup>5</sup>, Myles Brown<sup>2,3</sup>, Geoffrey L. Greene<sup>1</sup>

8

9 1: Ben May Department for Cancer Research, University of Chicago, Chicago, IL 60637 USA

10 2: Center for Functional Cancer Epigenetics, Dana-Farber Cancer Institute, Boston, MA 02215 USA

11 3: Department of Medical Oncology, Dana Farber Cancer Institute, Boston, MA 02215 USA

12 4: Department of Molecular Medicine, The Scripps Research Institute, Jupiter, FL 33458, USA

13 5: Department of Chemistry, University of Illinois at Urbana-Champaign, Urbana, IL 61801 USA

14 6: Department of Biochemistry, College of Medicine, Center for Biophysics and Computational Biology,  
15 and Beckman Institute for Advanced Science and Technology, University of Illinois at Urbana-  
16 Champaign, Urbana, IL 61801 USA

17 7: Department of Electrical and Computer Engineering, TEES-AgriLife Center for Bioinformatics and  
18 Genomic Systems Engineering, Texas A&M University, College Station, TX 77843 USA

19 8. PamGene International B.V, 's-Hertogenbosch, Netherlands 5211

20 9: Human Oncology and Pathogenesis Program, Memorial Sloan-Kettering Cancer Center (MSKCC),  
21 New York, NY 10065, USA

22 **Running Title:** Bazedoxifene inhibits ER $\alpha$  with activating mutations.

23 **Precis:** Bazedoxifene's SERD activities enable it to resist the impact of activating ESR1  
24 mutations.

25 **Keywords (5):** ESR1 Somatic Mutations, Breast Cancer

26 **Significance:** Bazedoxifene (BZA) is a potent orally available antiestrogen that is clinically  
27 approved for use in hormone replacement therapy (DUAVEE). We explore the efficacy of BZA  
28 to inhibit activating somatic mutants of ER $\alpha$  that can arise in metastatic breast cancers after  
29 prolonged exposure to aromatase inhibitors or tamoxifen therapy. Breast cancer cell line,  
30 biophysical, and structural data show that BZA disrupts helix 12 of the ER $\alpha$  ligand binding  
31 domain to achieve improved potency against Y537S and D538G somatic mutants compared to 4-  
32 hydroxytamoxifen.

33 **Financial Support:**

34 SWF: Susan G. Komen Foundation PDF14301382

35 SWF, BDG, CEF, ML, GLG, WT, SC: Department of Defense Breakthrough Award W81XWH-  
36 14-1-0360

37 JAK: NIH DK015556, Breast Cancer Research Foundation BCRF-17-083

38 SC: NCI Cancer Center Support Grant (CCSG, P30 CA08748) and NIH R01CA204999

39 YS: NIH R35GM124952 and NSF CCF-1546278

40 **Conflicts of Interest:** Giles Buchwalter is an employee and shareholder at Celgene. Rene  
41 Houtman is an employee at PamGene International.

42 **Abstract**

43 Acquired resistance to endocrine therapy remains a significant clinical burden for breast cancer  
44 patients. Somatic mutations in the *ESR1* (estrogen receptor alpha (ER $\alpha$ ) gene ligand-binding  
45 domain (LBD) represent a recognized mechanism of acquired resistance. Antiestrogens with  
46 improved efficacy versus tamoxifen might overcome the resistant phenotype in ER+ breast  
47 cancers. Bazedoxifene (BZA) is a potent antiestrogen that is clinically approved for use in  
48 hormone replacement therapies. We find BZA possesses improved inhibitory potency against the  
49 Y537S and D538G ER $\alpha$  mutants compared to tamoxifen and has additional inhibitory activity in  
50 combination with the CDK4/6 inhibitor palbociclib. In addition, comprehensive biophysical and  
51 structural biology studies show that BZA's selective estrogen receptor degrading (SERD)  
52 properties that override the stabilizing effects of the Y537S and D538G ER $\alpha$  mutations.

53

54

55

56

57

58

59

60

61

## 62 **Introduction**

63 Estrogen receptor alpha (ER $\alpha$ ) plays critical roles in the etiology, treatment and  
64 prevention of the majority of breast cancers [1]. Due to the high degree of efficacy and wide  
65 therapeutic indices of endocrine therapies, patients may receive such treatments for progressive  
66 disease over the course of several years [2]. Unfortunately, the majority of ER+ metastatic breast  
67 cancers that initially respond to endocrine treatment will become refractory despite continued  
68 ER $\alpha$  expression [2]. Selective estrogen receptor modulators (SERMs) like tamoxifen are  
69 antagonistic in the breast and agonistic in the bone and endometrium. SERM agonist activity  
70 stems from tissue-specific co-regulator binding in the presence of tamoxifen [3]. In addition,  
71 somatic mutations to *ESR1* (gene for ER $\alpha$ ) ligand binding domain (LBD) were identified in 25-  
72 30% of patients who previously received endocrine treatment [2, 4-6]. Y537S and D538G are the  
73 two most prevalent mutations, and pre-clinical studies show that these mutations confer  
74 hormone-free transcriptional activity and relative resistance to tamoxifen and fulvestrant  
75 treatment [2, 4-6]. Both mutants enable constitutive ER $\alpha$  activity by favoring the agonist-like  
76 conformation of the receptor activating function-2 (AF-2) surface and significantly reduce  
77 hormone and 4-hydroxytamoxifen (the active metabolite of tamoxifen) binding affinities [7, 8].

78 Endocrine treatments with improved efficacy could potentially overcome resistance  
79 engendered by the activating somatic mutants and other mechanisms. In pre-clinical studies,  
80 fulvestrant (FULV, a selective estrogen receptor degrader (SERD) and complete antiestrogen) at  
81 high concentrations was the only molecule that reduced the Y537S and D538G ER $\alpha$  mutant  
82 transcriptional activity to basal levels [2, 4-6]. However, its clinical efficacy is limited by poor

83 solubility and oral bioavailability [9-11]. Consequently, new complete antiestrogens with  
84 improved oral bioavailability and pharmacokinetics, including AZD9496, GDC-0927, and  
85 RAD1901, are currently in development, although their suitability as long-term endocrine  
86 therapies remains to be determined [10, 12-14].

87 Here, we explore whether bazedoxifene (BZA), a potent antiestrogen that retains some  
88 SERM properties, shows activity against breast cancer cells that express ESR1 somatic mutants.  
89 We chose BZA because it has been extensively studied in clinical trials and is approved for the  
90 use in combination with conjugated equine estrogens for hormone replacement therapy in  
91 postmenopausal women (DUAVEE, Pfizer) in the US and for the prevention of osteoporosis as a  
92 single agent in Europe [9, 15]. Importantly, it displayed strong antagonist and SERD profiles in  
93 the breast while retaining beneficial agonist properties in the bone and did not stimulate  
94 endometrial tissue in pre-clinical studies [9, 16, 17]. Further, BZA showed good oral  
95 bioavailability and improved pharmacokinetics compared with fulvestrant (FULV) [9, 18].

96 In this study, breast cancer reporter gene assays reveal the inhibitory capacity of BZA against  
97 the ER $\alpha$  mutants compared to the SERM 4-hydroxytamoxifen (4-OHT) and SERD FULV in  
98 several ER $^{+}$  breast cancer cell lines (MCF-7, ZR75, T47D). We further assessed the ability of  
99 BZA to induce the degradation of WT, Y537S, and D538G somatic mutant ER $\alpha$  in MCF7 cells.  
100 Additionally, because inhibitors of CDK4/6 combined with antiestrogens are approved for first  
101 line therapy and beyond in metastatic ER $^{+}$  breast cancers [19-21], we examined whether the  
102 CDK4/6 inhibitor, palbociclib, can be used in combination with BZA to enhance the inhibition of  
103 breast cancer cell proliferation. Importantly, comprehensive structural and biophysical studies  
104 provide additional molecular insights into the chemical differences between BZA, 4-OHT, and  
105 raloxifene (RAL, another SERM) that appear to underlie the SERD properties of BZA and its

106 improved inhibitory efficacy against the Y537S and D538G mutants in breast cancer cells. **Table**  
 107 **1** shows the chemical structures of the molecules examined in this study and summarizes their  
 108 clinical indications.

109 **Table 1:** Competitive inhibitors of estrogen receptor alpha.

| Antiestrogen                                                                                                        | Class     | Approved Clinical Indications                                                                                                                                                                                                                                    |
|---------------------------------------------------------------------------------------------------------------------|-----------|------------------------------------------------------------------------------------------------------------------------------------------------------------------------------------------------------------------------------------------------------------------|
| 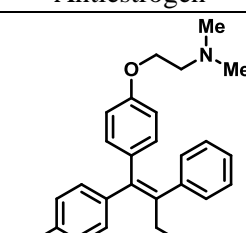 <p>4-Hydroxytamoxifen (4-OHT)</p> | SERM      | <ul style="list-style-type: none"> <li>• Adjuvant treatment for ER+ breast cancers [22].</li> <li>• Metastatic Breast Cancer [23].</li> <li>• Ductal Carcinoma in Situ [24].</li> <li>• Reduction in Breast Cancer Incidence in High Risk Women [25].</li> </ul> |
|  <p>Raloxifene (RAL)</p>          | SERM      | <ul style="list-style-type: none"> <li>• Osteoporosis in postmenopausal women [26].</li> <li>• Reduction in Breast Cancer Incidence in High Risk Women [27].</li> </ul>                                                                                          |
|  <p>Fulvestrant (FULV)</p>       | SERD      | <ul style="list-style-type: none"> <li>• First-line therapy for metastatic breast cancer [28].</li> <li>• Postmenopausal women with progressive breast cancer following other antiestrogen therapy [29, 30].</li> </ul>                                          |
|  <p>Bazedoxifene (BZA)</p>       | SERM/SERD | <ul style="list-style-type: none"> <li>• In combination with conjugated equine estrogens (DUAVEE) to prevent postmenopausal osteoporosis [15].</li> </ul>                                                                                                        |

110

## 111 **Results**

### 112 **Bazedoxifene Displays SERD Activity in MCF-7 Cells that Express WT ER $\alpha$**

113 To assess the ability of BZA to inhibit WT ER $\alpha$  in breast cancer cells, we examined its  
114 impact on ER $\alpha$  transcriptional activity, degradation and cell growth in MCF-7 cells. 4-  
115 hydroxytamoxifen (4-OHT) was used as a representative SERM and FULV was used as a  
116 representative SERD (**Figure 1**). In MCF7 cells that expressed an ERE-luciferase reporter gene,  
117 BZA was a more potent inhibitor of WT ER $\alpha$  transcription than either 4-OHT or FULV  
118 (inhibition of luciferase IC<sub>50</sub> for BZA = 0.12 nM, 4-OHT = 0.39 nM and FULV = 0.76 nM)  
119 (**Figure 1A**). To test the effect of BZA on endogenous WT ER $\alpha$  transcriptional activity, qPCR  
120 was used to quantify the relative mRNA levels of known ER target genes, including cyclin D1,  
121 c-myc, CA12, and GREB1, in MCF-7 cells treated with estradiol (E2) or with E2 in combination  
122 with BZA, 4-OHT or FULV at 10<sup>-8</sup> and 10<sup>-6</sup> M (antagonistic mode). For cyclin D1, 4-OHT  
123 increased the mRNA level at 10<sup>-8</sup> M and showed little effect at 10<sup>-6</sup>M, while both FULV and  
124 BZA decreased mRNA levels at 10<sup>-6</sup> M (**Figure 1B**). The agonist activity of tamoxifen at low  
125 concentrations has been described previously [31]. BZA increased c-myc mRNA levels at 10<sup>-8</sup> M  
126 while it significantly decreased c-myc mRNA at 10<sup>-6</sup> M (**Figure 1C**). Presumably this effect is  
127 similar to the behavior of low-level tamoxifen stimulation and merits further examination.  
128 Interestingly, 10<sup>-6</sup> M BZA showed the greatest reduction in mRNA levels of both CA12 and  
129 GREB compared to 4-OHT and FULV (**Figure 1, D and E**).

130 As BZA was shown to behave as a SERM/SERD in previous studies [9, 17], we next  
131 tested the activity of BZA as an inducer of ER $\alpha$  degradation and observed dose-dependent ER

132 degradation in MCF7 cells. Overall, BZA mediated similar levels of ER $\alpha$  degradation compared  
 133 to FULV (**Figure 1F**). In terms of cell growth inhibition, BZA showed an improved IC<sub>50</sub>  
 134 compared to 4-OHT and in the same range as fulvestrant (BZA IC<sub>50</sub> = 2.4x10<sup>-10</sup> M, FULV IC<sub>50</sub> =  
 135 3.1x10<sup>-10</sup> M and 4-OHT IC<sub>50</sub> = 1.19x10<sup>-9</sup> M (**Figure 1G**). Together, these data indicate that BZA  
 136 degrades WT ER $\alpha$  in breast cancer cells and is more effective at inhibiting ER transcription and  
 137 cell growth than 4-OHT and FULV.

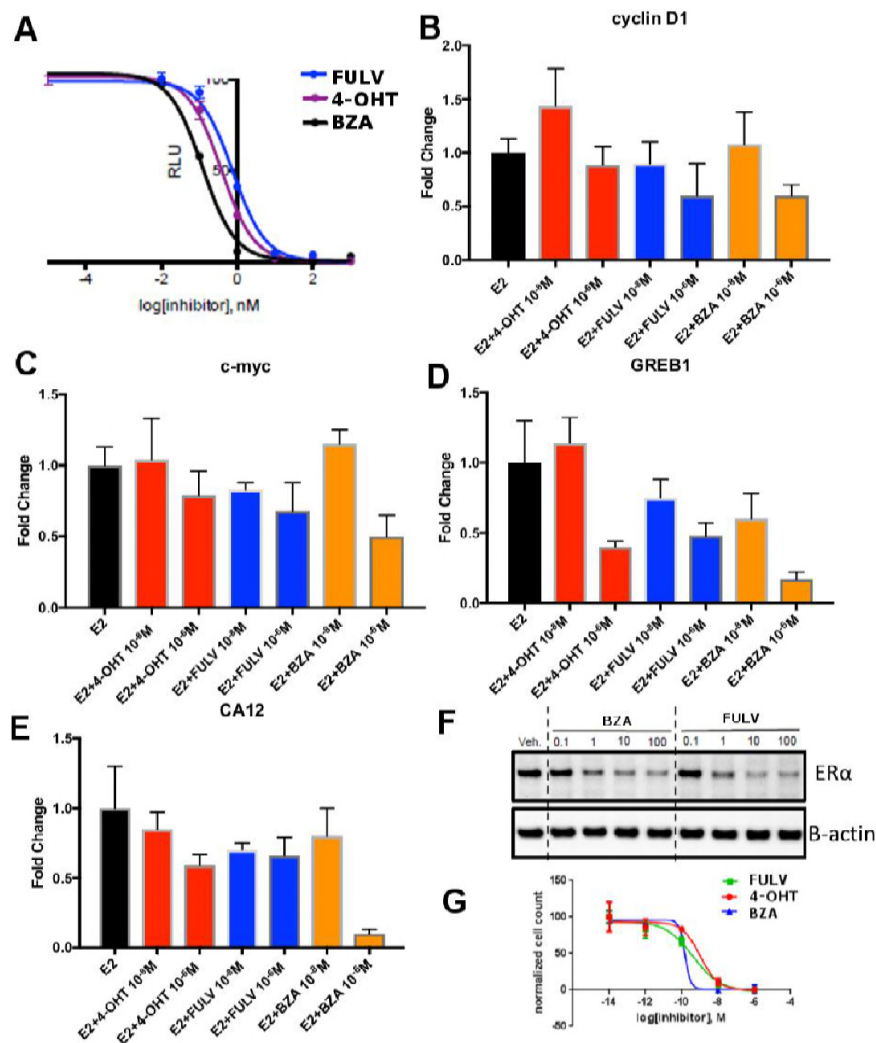

138

139 **Figure 1:** The inhibitory potency of BZA in MCF-7 cells. **A)** ER $\alpha$  transcriptional reporter gene assay in  
 140 cells treated with BZA, FULV, and 4-OHT. **B)** Relative cyclin D1 mRNA levels of in MCF-7 cells  
 141 treated with E2 plus 4-OHT, FULV, or BZA vehicle and normalized to E2. **C)** Relative c-myc mRNA  
 142 levelsMCF-7 cells treated with E2 plus 4-OHT, FULV, or BZA vehicle and normalized to E2. **D)**

143 Relative GREB1 mRNA levels in MCF-7 cells treated with E2 plus 4-OHT, FULV, or BZA vehicle and  
144 normalized to E2. **E)** Relative CA12 mRNA levels of MCF-7 cells treated with E2 plus 4-OHT, FULV,  
145 or BZA vehicle and normalized to E2. **F)** ER $\alpha$  degradation in MCF-7 cells with increasing doses of BZA  
146 or FULV normalized to  $\beta$ -actin. **G)** Inhibition of cell growth with increasing concentrations of BZA,  
147 FULV, or 4-OHT.

#### 148 **BZA is a Potent Inhibitor of Activating Somatic Mutants of ER $\alpha$ in Breast Cancer Cells**

149 We next tested the activity of BZA in MCF7 cells that ectopically expressed the Y537S  
150 mutant ER $\alpha$  to determine the inhibition of Y537S mutant cell growth. BZA demonstrated an  
151 increased potency compared to FULV and 4-OHT, with an IC<sub>50</sub> of  $1 \times 10^{-10}$  M vs  $2 \times 10^{-9}$  M and  
152  $7 \times 10^{-9}$  M, respectively (**Figure 2A**). In addition, qPCR data showed that BZA inhibited the  
153 transcription of ER $\alpha$  target genes cyclin D1, c-Myc, and PR, in cells expressing the Y537S  
154 mutant, in a dose-dependent manner, confirming the on-target effects of BZA in the presence of  
155 the mutation (**Figure 2B**).

156 To evaluate the ability of BZA to induce WT and mutant ER $\alpha$  degradation in breast  
157 cancer cells, we treated MCF-7 cells that ectopically expressed HA-tagged WT, Y537S and  
158 D538G ER $\alpha$  with BZA and other ligands for comparison. Levels of WT and mutant ER $\alpha$  were  
159 quantified using immunoblots with an anti-HA antibody. Cells were treated with 10 nM E2, or  
160 100 nM 4-OHT, 100 nM BZA, 100 nM RAL, 1  $\mu$ M FULV or vehicle for 24 hours before  
161 immunostaining; 1  $\mu$ M FULV was chosen because it was the minimal concentration necessary to  
162 achieve maximal ER $\alpha$  degradation. All data were normalized to vehicle-treated cells. In cells  
163 expressing HA-WT ER $\alpha$ , BZA and FULV induced degradation of the receptor to similar levels  
164 while the amount of the receptor increased upon 4-OHT treatment and was slightly reduced with  
165 E2 and RAL (**Figure 2C and D**). Interestingly, for the Y537S mutant, ER $\alpha$  expression remained  
166 unchanged for E2 and FULV, while it increased for 4-OHT and RAL. Y537S ER $\alpha$  also  
167 increased with BZA but less so than RAL or 4-OHT. Surprisingly, BZA degraded the D538G



168 ER $\alpha$  mutant to a greater extent than FULV while 4-OHT and RAL both increased its expression  
 169 after 24 hours. It should be noted that BZA and FULV elicited consistent WT and mutant ER $\alpha$   
 170 degradation across all replicates (**Supplemental Figure 1**). However, 4-OHT and RAL elicited  
 171 slight variations in the actin-normalized quantity of ER $\alpha$  after 24-hours. Overall, these data  
 172 suggest that BZA degrades WT and D538G ER $\alpha$  in MCF7 cells, but that the Y537S mutant is  
 173 resistant to degradation. However, the levels of Y537S ER $\alpha$  in the BZA treated cells were still  
 174 reduced compared to 4-OHT and RAL treatment, consistent with the reduced activities  
 175 demonstrated by these compounds in MCF-7 reporter gene assays [2].

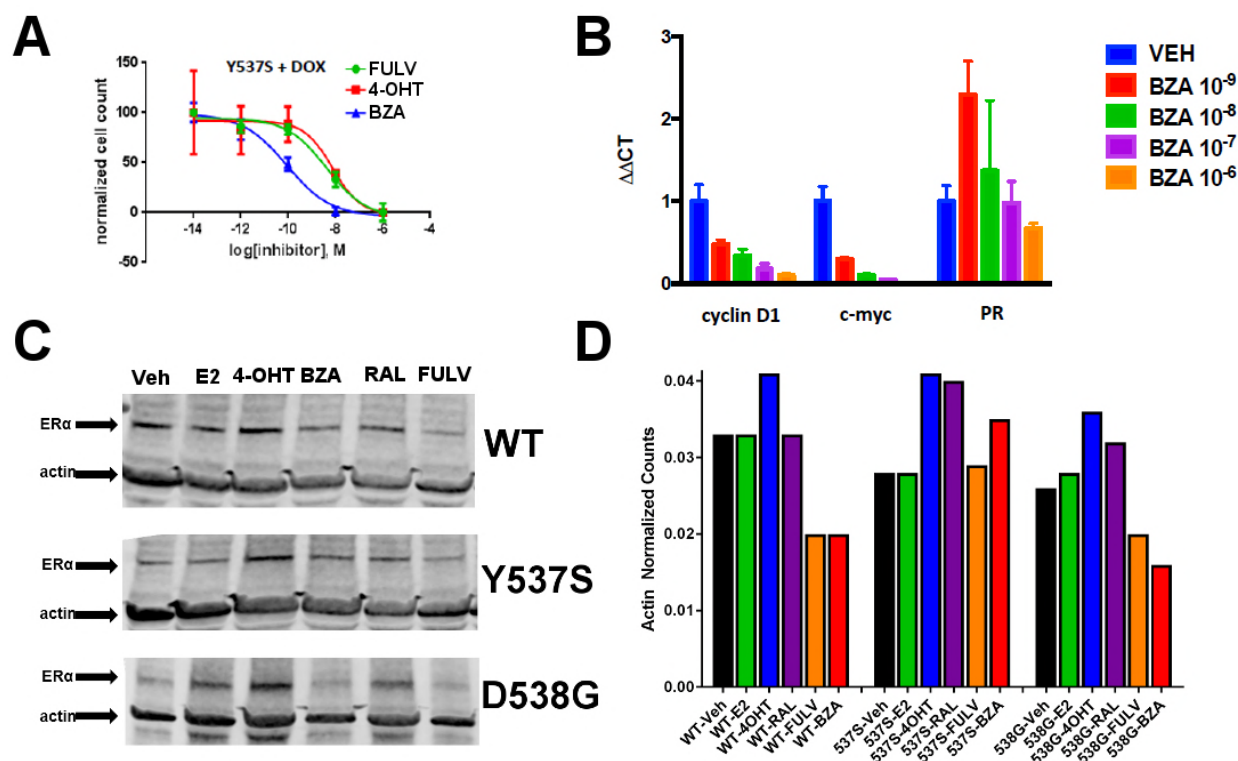

176  
 177 **Figure 2:** The ability of BZA to disrupt Y537S and D538G ER $\alpha$  activity. **A)** Cell growth in MCF-7 cells  
 178 with DOX-induced Y537S ER $\alpha$  expression. **B)** Inhibition of ER $\alpha$  target genes in DOX-induced Y537S  
 179 ER $\alpha$  expressed MCF-7 cells with increasing doses of BZA. **C)** Representative immunoblot of HA-ER $\alpha$   
 180 WT, 537S, or D538G treated with E2, 4-OHT, BZA, RAL, or FULV for 24 hours. **D)** Representative  
 181 counts of HA-ER $\alpha$  from the immunoblot normalized to actin.

182

183 **Dual Treatment with BZA and Palbociclib**

184 CDK4/6 inhibitors have emerged as potent agents in the treatment of metastatic ER+  
185 breast cancer in combination with endocrine treatment. Combined endocrine treatment with a  
186 CDK4/6 inhibitor is now the standard of care in either first or second line treatment of metastatic  
187 ER+ breast cancer [19-21]. Because BZA showed increased activity over FULV and 4-OHT, we  
188 explored whether the activity of BZA combined with the CDK4/6 inhibitor, palbociclib (PB), in  
189 multiple ER positive cell lines (MCF-7, ZR75, T47D) and long-term, estrogen-deprived (LTED)  
190 ER+ MCF7 cells that mimic resistance to aromatase inhibitors. For the first three cell lines, the  
191 combination of BZA and PB demonstrated the greatest arrest in cellular proliferation, whereas  
192 for the LTED cells it was comparable to PB+FULV (**Figure 3A-D**). Additionally, reduced  
193 proliferation of MCF-7 cells expressing the Y537S mutant was observed for the BZA+PB  
194 treatment compared to all other treatments (**Figure 3E and F**). Transcriptional reporter gene  
195 assays in MCF7 cells showed that: 1. BZA had superior activity in the inhibition of ER  
196 transcriptional activity compared to fulvestrant. In addition, palbociclib does not affect ER  
197 transcriptional activity either as a single agent or in combination with BZA (**Figure 3G and 3H**)  
198 . Similarly, immunoblotting for ER showed that treatment with PB does not affect BZA or  
199 FULV induced degradation of ER $\alpha$  (**Figure 3I**). In sum, these data show that dual inhibition of  
200 CDK4/6 with PB and ER $\alpha$  with BZA is an effective combination with significant activity against  
201 breast cancer cells expressing WT or constitutively active mutant ER $\alpha$ .

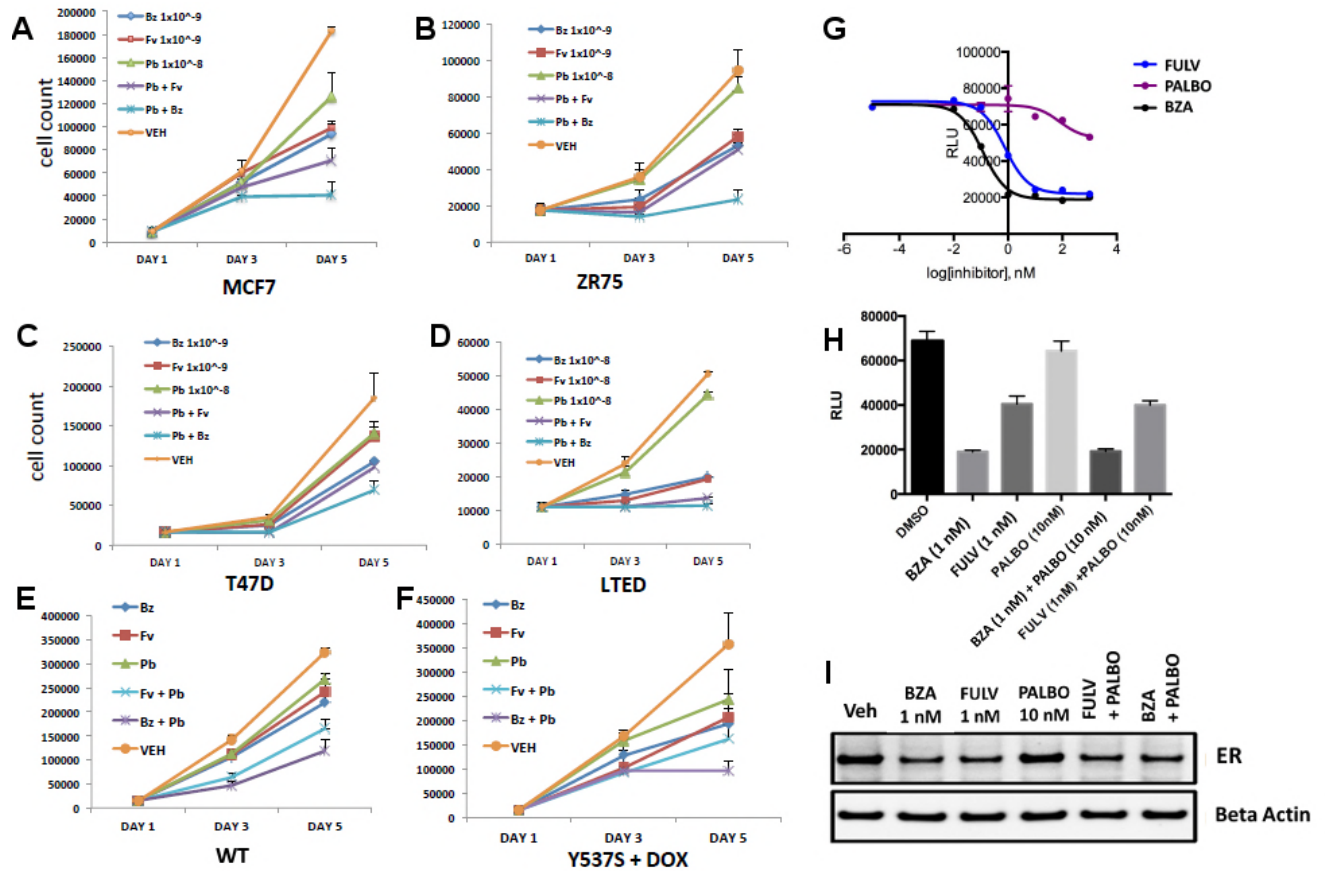

202

203 **Figure 3:** Combination treatment with CDK4/6 inhibitor and BZA. **A)** Cell growth inhibit with MCF7  
 204 breast cancer cells. **B)** ZR75 breast cancer cells. **C)** T47D breast cancer cells. **D)** LTED breast cancer  
 205 cells. **E)** Non-induced MCF7 breast cancer cells with a dox-inducible ER $\alpha$  Y537S mutant. **F)** MCF7 cells  
 206 expressing ER $\alpha$  Y537S. **G)** Dose-response curves for inhibition of ER $\alpha$  transcriptional activity in the  
 207 presence of BZA, PALBO, and FULV in MCF7 cells. **H)** ER $\alpha$  transcriptional reporter gene assays for  
 208 combination treatments. **I)** ER $\alpha$  stability resulting from combination treatments.

209

210 **Coregulator Binding Specificity and Affinities of WT and Mutant ER $\alpha$  with BZA, 4-OHT,**  
 211 **and FULV**

212 Because hormone regulated coactivator recruitment is crucial for ER $\alpha$  genomic action  
 213 and inhibition of coactivator recruitment is a key aspect of SERM-mediated ER $\alpha$  antagonism  
 214 [32], we tested the effects of 4-OHT, BZA and FULV on co-regulator binding. We applied the  
 215 Microarray Assay for Real-time Coregulator-Nuclear receptor Interaction (MARCoNI), which

216 allows the quantification of binding affinity of a nuclear receptor with co-regulator peptides. To  
217 determine the effect of 4-OHT, BZA and FULV on co-regulator binding to WT, Y537S and  
218 D538G ER $\alpha$ , MCF7 cells that ectopically express HA-tagged WT, Y537S, or D538G ER $\alpha$  were  
219 used in conjunction with an HA antibody to detect ER binding to the co-regulator array.  
220 Experiments were performed under E2 stimulated conditions for WT ER and under apo  
221 conditions for mutant ER $\alpha$ . Overall, dose-dependent inhibition of co-regulator binding was  
222 observed for the majority of co-regulator peptides with the three drugs (**Supplemental Figure**  
223 **2A**). A comparison of EC<sub>50</sub> levels for inhibition of co-regulator binding of the three ER  
224 antagonists showed that EC<sub>50</sub> levels for FULV in both the WT and mutant cells was higher, as  
225 expected given the mechanism of action of FULV, compared to SERMs. The 4-OHT and BZA  
226 EC<sub>50</sub>s were higher in the presence of the Y537S and D538G mutations. Collectively, these  
227 results show that differences in antagonistic activity manifested by the three endocrine treatments  
228 are reflected by changes in co-regulator binding. There are significant differences among these  
229 drugs in their antagonistic activity on WT-ER and mutant ER.

### 230 **SERMs and SERDs Abolish Hormone-Independent ER $\alpha$ -Coactivator Binding *In Vitro* and** 231 **Reverse Hormone Recruitment of Coactivators**

232 To further dissect the molecular basis for the reduced BZA, 4-OHT, and RAL  
233 potency/efficacy observed with mutant ERs, biochemical coactivator recruitment and  
234 competitive ligand-binding experiments were performed. As described previously [8], Förster  
235 resonance energy transfer (FRET) assays were used to evaluate the interaction of wild type and  
236 Y537S and D538G mutant ER $\alpha$  with steroid receptor coactivator 3 (SRC3), a key coregulator in  
237 breast cancer cells. The nuclear receptor recognition domain (NRD) of SRC3 and LBD of the  
238 ERs, were used in these experiments.

239 Previously, we showed that in the absence of hormone, SRC3 did not bind to WT ER $\alpha$   
240 LBD, whereas Y537S ER $\alpha$  bound SRC3 markedly in the absence of E2 with a 10-fold reduced  
241 affinity, and D538G ER $\alpha$  bound SRC3 with a 100-fold reduced affinity compared to hormone  
242 bound WT receptor [8]. To better ascertain the potency of ligands to inhibit coactivator  
243 recruitment, we titrated the ligands into fixed concentrations of LBD and SRC3 and monitored  
244 LBD-SRC3 interaction by a FRET assay; the three samples were primed with E2 to get a  
245 measurable signal from WT and D538G ER. 4-OHT, BZA and RAL reversed the binding of  
246 SRC3 NRD to the two mutant ERs and WT-ER $\alpha$  with similar potencies (**Supplemental Figure**  
247 **2B**). Together, these data show that BZA, 4-OHT, and RAL inhibit both the basal and E2-  
248 stimulated recruitment of SRC3 coregulator by the WT and mutant ER $\alpha$  *in vitro*.

#### 249 **BZA, RAL and FULV Elicit Similar Reduced Binding Affinities for Y537S and D538G** 250 **Compared to WT ER $\alpha$ LBD**

251 To examine what role alterations in binding affinity may play in this reduced potency,  
252 competitive [<sup>3</sup>H]-E2 ligand binding assays ligand-binding experiments were used to examine the  
253 effect of Y537S and D538G mutations on BZA, RAL, and FULV ER binding affinities *in vitro*.  
254 We previously showed that the E2 and 4-OHT binding was significantly reduced for both the  
255 Y537S and D538G mutants [8]. Affinities were reported using K<sub>i</sub> values calculated from IC<sub>50</sub>  
256 values using the Cheng-Prusoff equation (**Supplemental Table 2**) [33]. The affinities of RAL,  
257 BZA and FULV for the ER $\alpha$  mutants were reduced 9 to 27-fold relative to WT-ER $\alpha$ . It should be  
258 noted that the binding affinity of 4-OHT remained the highest compared to RAL, BZA and  
259 FULV against the mutant LBDs. The binding affinities of all tested antiestrogens were somewhat  
260 more reduced in D538G than in Y537S. However, FULV and BZA demonstrated the highest  
261 potencies in the transcriptional reporter gene assays, even though they exhibited reduced

262 affinities compared to 4-OHT. Therefore, our data indicate that other factors beyond the reduced  
263 binding affinity of mutant LBDs for SERM or SERD must play a role in their decreased potency.

### 264 **The SERD Properties of BZA Arise from its Disruption of Helix 12**

265 X-ray crystallography was used to reveal the structural details of BZA's antiestrogen  
266 properties. An x-ray crystal structure for the WT ER $\alpha$  LBD, in complex with BZA was solved to  
267 2.4 Å with two dimers in the asymmetric unit (ASU) (PDB: 4XI3). The BZA ligand and H12 are  
268 well resolved in each monomer in the ASU; poorly resolved residues were not included in the  
269 model. **Supplemental Figure 3** shows the observed difference map density for the BZA ligand  
270 for chain A. We were unable to obtain diffraction quality crystals with BZA or RAL in complex  
271 with either the Y537S or D538G mutant LBDs.

272 Clear structural differences are apparent compared to the previously published molecular  
273 modeling and docking simulations of the ER $\alpha$  LBD-BZA complex [34]. Specifically, the C3  
274 methyl on the indole ring of BZA appears to shift the core of the molecule away from M386,  
275 L391 and L428 and towards H12. BZA is most structurally similar to RAL; however, BZA  
276 displays more SERD-like behavior [9]. **Figure 4** shows a superposition of the ER $\alpha$  LBD-BZA or  
277 RAL x-ray crystal structures. Interestingly, the distal phenol on BZA appears to form a hydrogen  
278 bond with improved binding geometry to H524 compared to the distal phenol of RAL. This  
279 suggests that the ketone on the RAL linker constrains the phenyl group, sterically precluding the  
280 adoption of an ideal hydrogen bonding geometry with H524. The core differences for BZA  
281 broadcast down the linker arm to alter its vector towards H12 where the azepan ring now pushes  
282 against V534 and P535 (**Figure 4B**). The alterations to V534 and P535 propagate to H12 which  
283 appears displaced out of the AF-2 cleft into a less stable orientation.

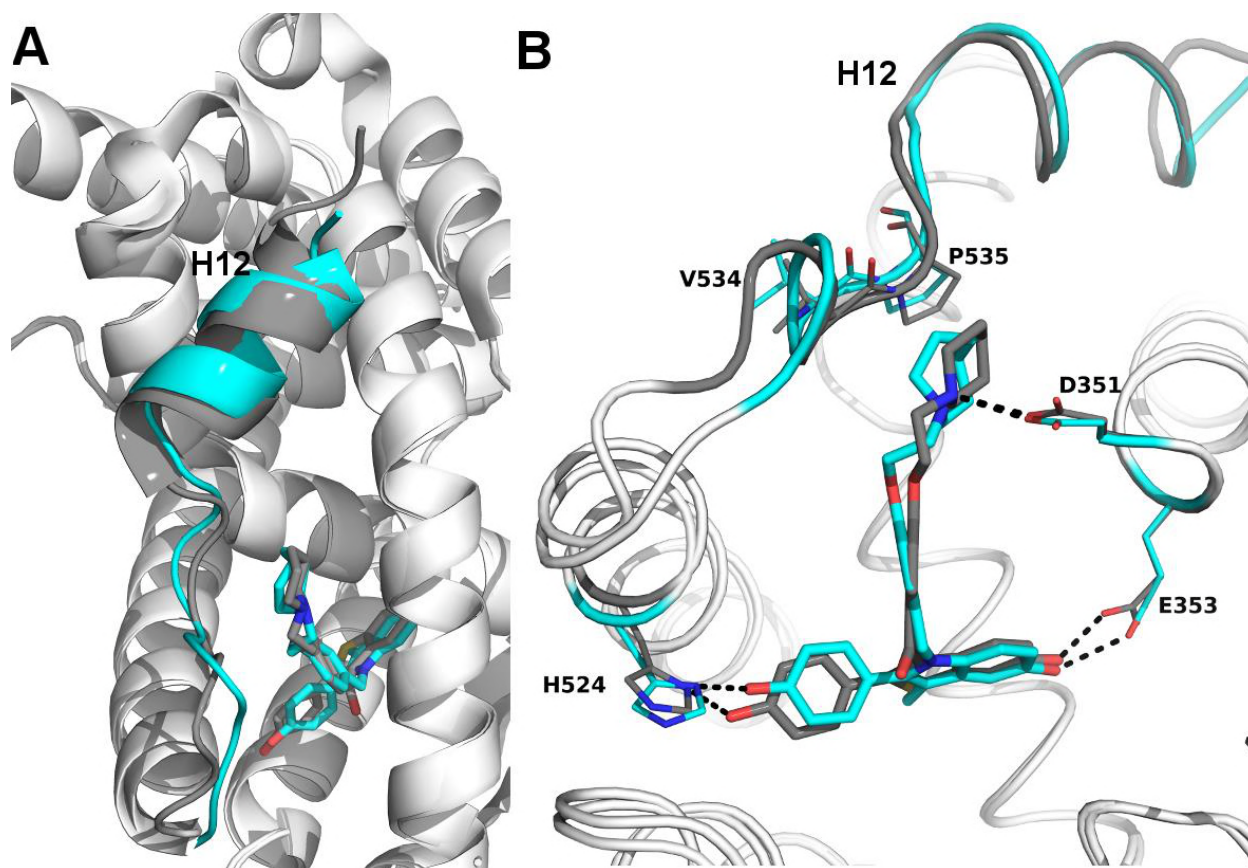

284

285 **Figure 4:** Structural Basis for the SERD properties exhibited by BZA. A) Overlay of BZA (cyan) with  
286 RAL (grey) x-ray crystal structures showing differences in H11-12 loop and H12 orientation. B)  
287 Hydrogen bonds (dashed lines) formed by BZA and RAL in the binding pocket and highlighting  
288 differences in H11-12 loop and H12 conformation. PDBs: 1ERR and 4XI3.

289

## 290 **BZA Binding Conformation is Energetically Favored Compared to RAL**

291 Quantum mechanical calculations were employed to determine whether inherent  
292 differences in the BZA and RAL ligands accounted for differences in antagonist potency. A  
293 significant energetic shift was observed over the time-course of the scans, revealing that the BZA  
294 arm can adopt a set of torsion angles with significantly reduced energetic penalties compared to  
295 RAL (**Figure 5A**). Importantly, the energetic minima well is significantly broader for BZA  
296 compared to RAL, indicating that the angles adopted by BZA in the ER $\alpha$  ligand-binding site are

297 more favorable than RAL. Furthermore, an energetic penalty of approximately 1 kcal/mol would  
298 be incurred by RAL to adopt the same conformation observed for BZA in the x-ray crystal  
299 structure. Together these data show that the BZA ligand itself possesses physical properties that  
300 are more favorable to impact ER $\alpha$  H12 compared to RAL.

### 301 **BZA and FULV Reduce the Impact of Y537S and D538G Mutations on Helix 12 Dynamics**

302 SERDs competitively bind to the ER $\alpha$  LBD and destabilize helix 12 (H12), leading to  
303 proteosomal degradation, while SERMs push the helix into the AF2 cleft to block coregulator  
304 binding [8]. Furthermore, AZD9496, a newer orally available SERD pushes H12 into the AF2  
305 cleft but destabilizes the helix [13]. Previous work showed that the Y537S and D538G mutants,  
306 in complex with 4-OHT, adopts an altered antagonist conformation with respect to the WT-4-  
307 OHT complex [8]. Here, we explored how Y537S and D538G ER $\alpha$  LBD mutations impact H12  
308 mobility in the BZA complex using differential hydrogen-deuterium exchange mass  
309 spectrometry (HDX-MS). For comparisons we chose E2 as a representative hormone, FULV as a  
310 representative SERD, and 4-OHT as a representative SERM. Average time-dependent amide-  
311 deuterium uptake kinetics is indicative of conformational flexibility in proteins with highly  
312 dynamic regions being more susceptible to solvent deuterium exchange compared to  
313 conformationally rigid regions. As expected, addition of E2 resulted in an increased protection  
314 against exchange in H12 (inferred as increased stability or less dynamic), and this protection was  
315 enhanced for the Y537S and D538G mutants (**Supplemental Figure 4**). Also, FULV treatment  
316 led to increased D<sub>2</sub>O uptake in H12 (interpreted as destabilization) of regions near H12 in both  
317 the WT and D538G mutant (**Supplemental Figure 5**), consistent with its SERD-like properties.  
318 Unfortunately, we were unable to collect HDX data for the Y537S mutant with FULV because it  
319 precipitated out of solution. Similar to previously published data [8], binding of 4-OHT resulted



320 in decreased stability of H12 with the Y537S compared to D538G and WT receptor  
321 (**Supplemental Figure 6**), suggesting that these mutants resist the ability of the SERM to alter  
322 their structure. Interestingly, addition of BZA did not increase the stability (lesser protection) of  
323 the region near H12 to as great of an extent as 4-OHT in WT and mutant ER $\alpha$  LBDs, suggesting  
324 that BZA-bound ER $\alpha$  adopts a less stable antagonist conformation than 4-OHT-bound ER $\alpha$   
325 (**Supplemental Figure 7**), consistent with the crystal structure. These data suggest that, while  
326 their antagonist conformations are altered by Y537S or D538G mutations, the ER $\alpha$ -BZA and  
327 FULV complexes maintain potency because they resist the stabilizing impact of the mutations  
328 better than 4-OHT.

### 329 **How Y537S and D538G ER $\alpha$ LBD Mutants Alter the BZA Antagonist Structure**

330 To understand the structural basis for the reduced BZA degradation of Y537S compared  
331 to WT ER $\alpha$ , atom-level explicit-solvent molecular dynamics (MD) simulations for the LBD of  
332 ER $\alpha$  Y537S-BZA and D538G-BZA were performed using the WT-BZA crystal structure as  
333 template. When compared to the WT-4-OHT structure (PDB: 3ERT), the D538G-4-OHT  
334 structure displayed a significantly altered H11-12 loop, which leads to a perturbed H12  
335 antagonist state (**Figure 5B**) [8].

336 MD simulations show that H12 of both BZA-bound mutants remain close to an  
337 antagonist conformation (**Figure 5B, D**). Furthermore, H12 conformational fluctuations  
338 observed in MD simulations are less pronounced in Y537S-BZA than they are in D538G-BZA  
339 (**Figure 5C**), which echoes the aforementioned reduced H12 dynamics observed in HDX-MS  
340 data and agrees with our result that Y537S reduces BZA activity more than D538G does. Over  
341 the course of the simulations, the Y537S-BZA structure shows a hydrogen bond formation

342 between E380 and S537 (**Figure 5B**), which could contribute to fewer H12 conformational  
343 fluctuations in Y537S ER $\alpha$ . It should be noted that this hydrogen bond is not sterically allowed  
344 in the WT-BZA crystal structure. This predicted hydrogen bond may stabilize H12 in the AF-2  
345 cleft relative to WT. The simulated H11-12 loop conformations for both Y537S-BZA and  
346 D538G-BZA resemble WT-BZA or D538G-4-OHT, being closer to the ligand binding site, than  
347 they do to WT-4-OHT. The D538G mutation further increases the conformational variance of  
348 the H11-12 loop compared to Y537S (**Figure 5C**), which can be explained by the lack of a  
349 hydrogen bond in Y537S and the greater backbone conformational freedom allowed by the  
350 mutant glycine residue. Additionally, the H11-12 loop of both Y537S and D538G appears  
351 further away from the protein core and BZA compared to that of WT (**Figure 5B, D**). We  
352 hypothesize that the varied conformations and increased dynamics of the H11-12 loop in both  
353 ER $\alpha$  mutants makes it more difficult for BZA to maintain sufficient interactions with the loop to  
354 disrupt the ER antagonist conformation. Together, these data show that both mutations produce a  
355 stable antagonist conformation, especially at H12, and reduce the SERD-like properties of BZA  
356 by lessening its ability to disrupt the H11-12 loop and stabilize H12 in the AF-2 cleft.

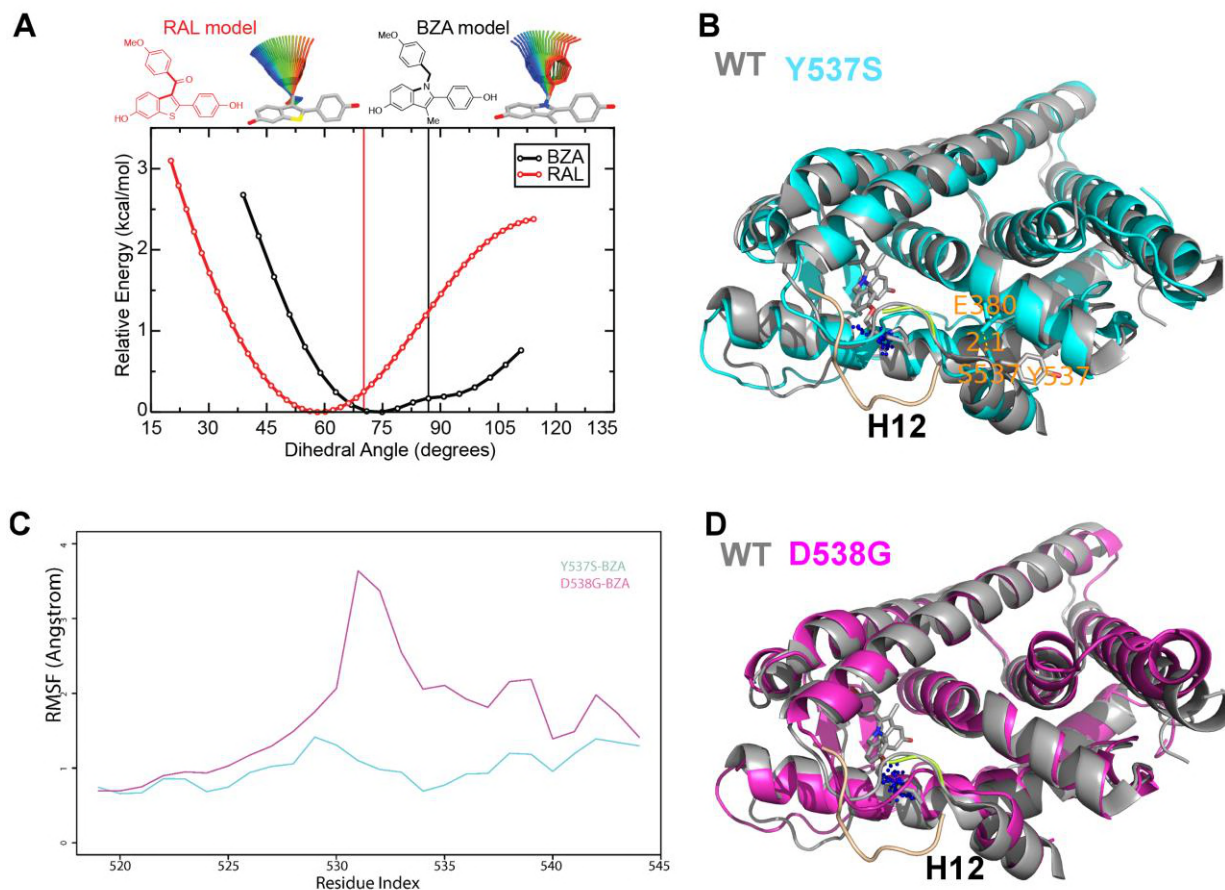

357

358 **Figure 5:** A) QM scan of RAL and BZA arm torsion angle energetics. B) Overlaid  
359 representative calculated structure of Y537S-BZA (cyan) closest to the last 50-ns average from  
360 molecular dynamics (MD) simulation and the WT-BZA structure, vertical lines represent the  
361 ligand binding conformation in the x-ray crystal structure. Nitrogen atoms of the azepane part of  
362 BZA for the last 50-ns MD ensemble are shown in blue spheres near H12. Loop H11-12 is also  
363 shown for crystal structures of WT-4-OHT (wheat; PDB: 3ERT) and D538G-4-OHT (yellow;  
364 PDB: 4Q50). C) Root mean squared fluctuations of ERα LBD residues, including the C-end of  
365 H11 (resi. 519-527), the loop H11-12 (resi. 528-535), and H12 (resi. 536-544), in the last 50-ns  
366 MD simulations for Y537S-BZA (cyan) and D538G-BZA (magenta). D) Overlay of a  
367 representative structure of D538G-BZA (magenta) from MD simulations and the same WT-BZA  
368 structure (gray) as in **B**.

369

370

## 371 **Discussion**

372 Somatic mutation to *ESR1* following prolonged estrogen-deprivation therapy represents a  
373 newly appreciated mechanism of acquired hormone resistance in metastatic breast cancer. The  
374 two most prevalent mutations, Y537S and D538G, give rise to a dysfunctional receptor that  
375 escapes hormone regulation and has decreased sensitivity to inhibition by 4-OHT and fulvestrant  
376 [8]. Newly characterized orally available pure antiestrogens (*e.g.*, GDC-0927, AZ9496, and  
377 RAD1901) are emerging as potentially potent inhibitors of these mutants, but their long-term  
378 clinical utility is unknown and their side effect profiles have not been studied in large patient  
379 populations [12, 14]. Because BZA is already clinically approved for use in hormone  
380 replacement therapy and is a potent ER $\alpha$  antagonist in the breast, an agonist in bone, and neutral  
381 in the endometrium with long-term safety data in thousands of patients, we explored its ability to  
382 inhibit the Y537S and D538G ER $\alpha$  somatic mutants in breast cancer [9].

383 We first quantified the ability of BZA to disrupt WT and mutant ER $\alpha$  transcription,  
384 induce degradation, and inhibit cell growth in MCF-7 cells. These data show that BZA has  
385 increased activity, compared to the SERD FULV and SERM 4-OHT, toward inhibition of cell  
386 growth and ER $\alpha$  transcriptional activity. Further, BZA elicited degradation of WT receptor,  
387 although not as much as FULV. Importantly, BZA reduced the levels of Y537S ER $\alpha$  relative to  
388 RAL and 4-OHT. Together these data suggest that the ability of BZA to degrade ER $\alpha$  confers an  
389 inhibitory advantage over 4-OHT in the context of the somatic mutants. Additionally, combined  
390 treatment with BZA and the CDK4/6 inhibitor palbociclib resulted in additional inhibitory  
391 potency of cellular proliferation in breast cancer cells expressing both WT and Y537S ER $\alpha$   
392 without impacting BZA's action. As such, combination BZA-CDK4/6 treatment shows  
393 significant potential in cell line experiments and merits further evaluation.

394           Comprehensive structural-biochemical investigations were undertaken to understand the  
395 basis for the SERD-like properties of BZA and its improved potency against the Y537S and  
396 D538G ER $\alpha$  LBD mutants compared to 4-OHT. Biochemical coactivator studies using  
397 recombinant ER $\alpha$  LBD demonstrated that BZA could inhibit the both basal and E2-induced  
398 recruitment of coregulators *in vitro*, while ligand-binding assays showed that the Y537S and  
399 D538G mutants had significantly reduced affinities for BZA, 4-OHT, RAL, and FULV.  
400 Interestingly, an HDX MS comparison of BZA, 4-OHT, and FULV suggested that FULV and  
401 BZA can both resist the impact of somatic mutation on their antagonist binding conformations  
402 compared to 4-OHT. An x-ray crystal structure of the WT-BZA complex revealed that  
403 differences in the core of the molecule translated to an altered vector of the linker arm, resulting  
404 in contacts with the H11-12 loop and a perturbed H12 antagonist binding mode. This less stable  
405 H12 antagonist conformation likely explains the SERM/SERD properties of BZA, wherein it  
406 allows H12 to adopt an antagonist conformation (like a SERM) that is somewhat destabilized,  
407 although not as destabilized as when FULV is bound.

408           Atomistic MD simulations were used to examine the molecular basis for the observed  
409 decrease in degradation of ER $\alpha$  within breast cancer cells expressing the Y537S and D538G  
410 mutants. Both mutants stabilized the antagonist conformation of H12 in the AF-2 cleft, while the  
411 Y537S appeared to be the more stable of the two by forming a hydrogen bond between S537 and  
412 E380. Interestingly, E380Q has also been found to be a recurrent ESR1 mutation able to confer  
413 endocrine resistance. MD simulations also suggest that these mutants have varied conformations  
414 and increased dynamics of loop H11-12, which potentially reduces BZA's ability to disrupt ER  
415 antagonist conformations. Together these results suggest that BZA retains its SERM antagonist  
416 properties within breast cancer cells expressing Y537S and D538G mutant ER $\alpha$  to a greater

417 extent than 4-OHT but its SERD-like properties are diminished. The reduced potency on the  
418 mutants likely derives from the stabilization of the apo receptor in the agonist conformation,  
419 which reduces the on rate of ligand binding [8], reflecting that the agonist conformer blocks  
420 ligand exchange [35].

421 Overall, our findings show the molecular basis for the SERD-like activity of BZA and its  
422 potential advantage with and without CDK4/6 inhibitor, versus 4-OHT, to inhibit the Y537S and  
423 D538G ER $\alpha$  mutants. Importantly, interrogating the structural details of BZA-ER $\alpha$  LBD binding  
424 suggests that molecules with improved pharmacological profiles that specifically disrupt the  
425 H11-12 loop at H12 will have clear advantages against breast cancer cells expressing WT,  
426 Y537S, and D538G ER $\alpha$ . **Figure 6** summarizes how BZA achieves SERM/SERD activity  
427 compared to SERM or agonist compounds. In fact, the newer SERM/SERDs and SERDs with  
428 improved pharmacologic profiles (*e.g.*, AZ9496) appear to do so using a similar mechanism [13].  
429 Therefore, further preclinical evaluation of BZA with and without a CDK4/6 inhibitor should be  
430 conducted in context of breast cancer cells expressing the Y537S and D538G somatic mutant  
431 ER $\alpha$ . In addition, the ability of other new SERDs to withstand the impact of Y537S and D538G  
432 mutations on their antagonist binding modes should be investigated.

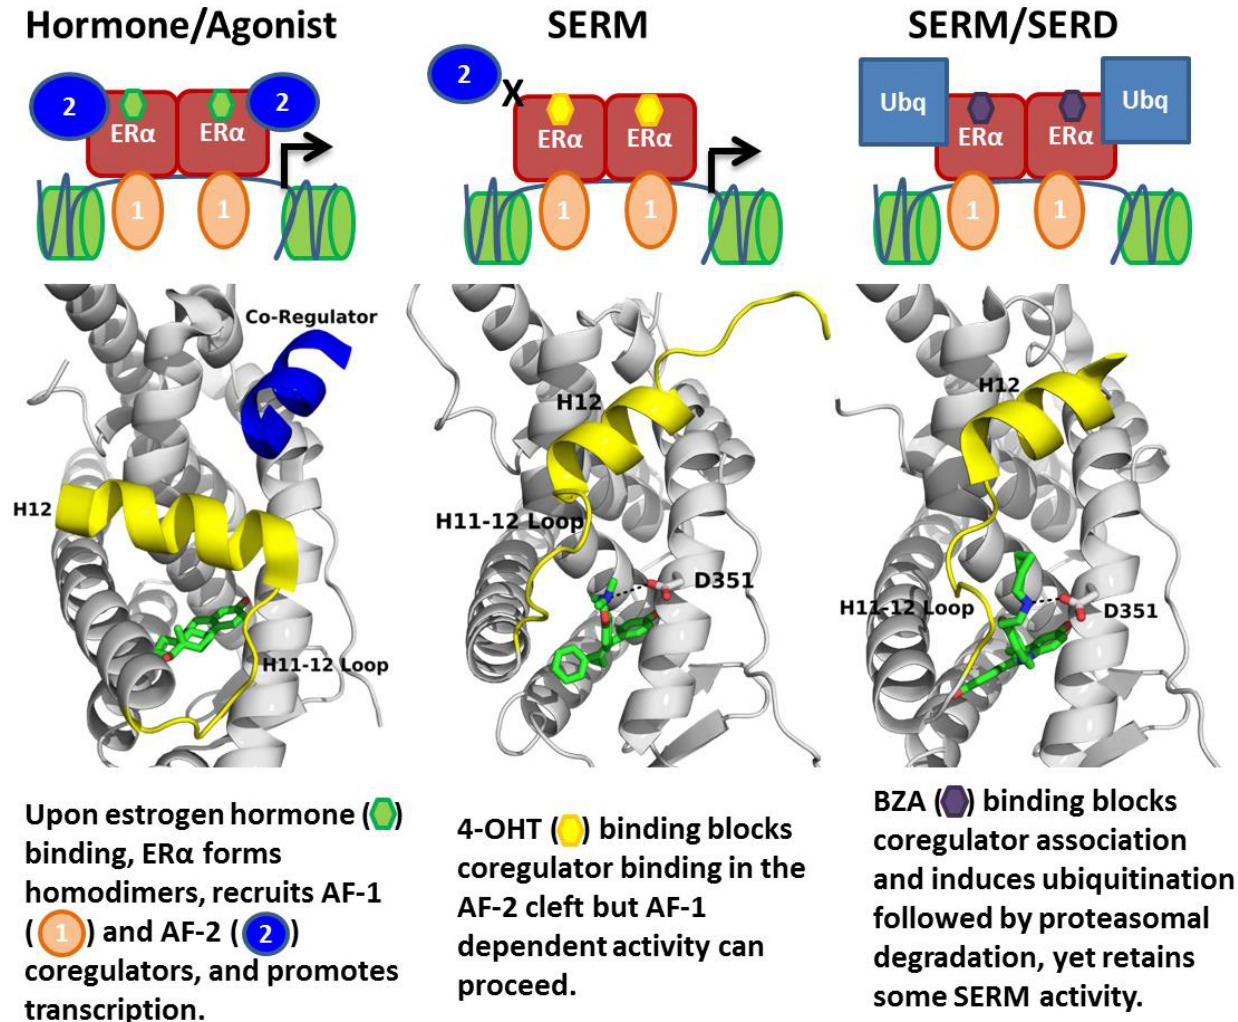

433

434 **Figure 6:** Summary of BZA's SERM/SERD activity compared to SERMs and agonist compounds.

435

436

437

438

439

440

## 441 **Materials Methods**

### 442 **Breast Cancer Cellular Reporter Gene Assays**

443 Luciferase reporter assay system (Promega) was used to monitor luciferase activity in MCF7  
444 cells with stable expression of ERE luciferase per the manufacturer's recommendations, using a  
445 single tube luminometer (BD Monolight 2010). MCF7 cells were plated in 6-well plates and  
446 treated with increasing doses of BZA, FULV or 4-OHT (0 / 0.01 / 0.1 / 1 / 10 / 100 / 1000nM) in  
447 complete medium for 24 hours. All studies were performed in triplicates, and luciferase results  
448 are reported as relative light units (RLU) and normalized with  $\beta$ -Galactosidase activity using  
449 Mammalian  $\beta$ -gal assay kit (Thermo Scientific). Mycoplasma was tested every 6 weeks in these  
450 cells and no mycoplasma was detected in the MCF-7 cell lines using the MycoAlert Mycoplasma  
451 Detection Kit (Lonza). MCF-7 cells were purchased directly from ATCC and the studies were  
452 completed within 1 year of purchase. Cells reached a maximum of 30 passages during these  
453 studies.

### 454 **ER $\alpha$ Stability Immunoblots**

455 Tet-ON MCF7 cells lines (HA-ER $\alpha$  WT, HA-ER $\alpha$  Y537S, HA-ER $\alpha$  D538G) were cultured in  
456 DMEM supplemented with 10% fetal bovine serum (FBS), 2 mM L-glutamate, 1% penicillin-  
457 streptomycin, 100  $\mu$ g/mL genitacin, and 100  $\mu$ g/mL hygromycin. Before western blotting  
458 experiments, 300,000 cells were plated in each well of a 6-well culture dish and cultured for 48  
459 hours in DMEM supplemented with 10% charcoal-stripped FBS (SFBS), 2 mM L-glutamate, 1%  
460 penicillin-streptomycin, and 0.2  $\mu$ g/mL doxycycline. Compounds were diluted in ethanol or  
461 DMSO. Cells were treated with either 10 nM estradiol (Sigma), 1  $\mu$ M FULV (Tocris), 100 nM  
462 Ral (Sigma), 100 nM BZA (Pfizer), 100 nM 4-OHT (Tocris), or vehicle (ethanol) for 24 hours.



463 Subsequently, cells were washed twice with 1 mL of ice-cold PBS, harvested via scraping, and  
464 pelleted at 4 °C. Cells were resuspended in 50 µL lysis buffer [0.1% CHAPS, 50 mM HEPES  
465 (pH 8.0), 120 mM NaCl, 1 mM EDTA, 10 mM Na pyrophosphate, and 10 mM glycerophosphate;  
466 supplemented with a protease inhibitor cocktail solution III (CalBiochem)]. Cells were lysed via  
467 3 freeze-thaw cycles. Lysates were then pelleted at 4 °C, and 100 µg of protein was mixed with  
468 standard 2x Laemmli buffer. Samples were loaded onto a 10% SDS-polyacrylamide  
469 electrophoresis gel, transferred after electrophoresis onto nitrocellulose membrane, and  
470 immunoblotted using anti-HA-tag (Cell Signaling C29F4) and anti-actin (Santa Cruz  
471 Biotechnology AC-15) antibodies. Membranes were probed using anti-rabbit 800 nm  
472 (Rockland) and anti-mouse 680 nm (Rockland) and imaged on the Licor Odyssey. Membrane  
473 intensities were normalized to actin control and quantified using ImageStudio. Mycoplasma was  
474 tested every 6 weeks in these cells and no mycoplasma was detected in any of the Tet-ON MCF-  
475 7 cell lines using the MycoAlert Mycoplasma Detection Kit (Lonza).

476

### 477 **Co-Regulator Interaction Profiling**

478 This method has been described previously [36]. Cell lysates of MCF7 cells expressing HA-  
479 tagged WT-ER, Y537S mutant ER and D538G mutant ER were quantified by ELISA (Active  
480 Motif, USA) to enable equimolar input. An array with a set of immobilized peptides representing  
481 coregulator-derived NR-binding motifs was incubated with a reaction mixture of crude lysate,  
482 vehicle (2% DMSO) with or without 1 µM 17β-estradiol (E2), increasing concentrations of BZA,  
483 4-OHT or FULV (0.1, 1, 10, 100, 1000 nM) and anti-HIS-Alexa488 (Qiagen, USA). Incubation  
484 was performed for 40 minutes at 20 °C, followed by removal of unbound receptor by washing  
485 and generation of a TIFF image of each array using a PamStation96 (PamGene International).

486 Image processing and quantification of ER $\alpha$  binding to each peptide on the array was performed  
487 by Bionavigator software (PamGene International).

### 488 **Coactivator Binding Assays**

489 *Protein preparation for TR-FRET.* Expression, purification, and site-specific labeling of the  
490 ER $\alpha$ -LBD was performed as described previously [37]. Generation of the nuclear receptor  
491 interaction domain (NRD) of human SRC3 coactivator has also been described previously [38].  
492 ER $\alpha$  LBD and the SRC3 fragment were labeled with Mal-dPEG4-biotin (Quanta BioDesign,  
493 Powell, OH), and 5-iodoacetamido fluorescein (Molecular Probes, Invitrogen, Eugene, OR),  
494 respectively.

495 *Coactivator Recruitment with Ligand Titration.* To raise the background level of SRC3 NRD  
496 binding, the ER $\alpha$  LBD preparation (1 nM ER-LBD, 0.25 nM SaTb, 100 nM SRC3-fluorescein)  
497 was primed with 20 nM E2, and then increasing ligand concentrations (from  $3 \times 10^{-12}$  to  $3 \times 10^{-7}$   
498 M) were added. Diffusion-enhanced FRET was determined by a parallel incubation without  
499 biotinylated ER-LBD and subtracted as a background signal. The time-resolved Förster  
500 resonance energy transfer measurements were performed with a Victor X5 plate reader (Perkin  
501 Elmer, Shelton, CT) with an excitation filter at 340/10 nm and emission filters for terbium and  
502 fluorescein at 495/20 and 520/25 nm, respectively, with a 100- $\mu$ s delay [39-41]. The data,  
503 representing 2–3 replicate experiments, each with duplicate points, was analyzed using  
504 GraphPad Prism 4, and are expressed as the IC<sub>50</sub> in nM.

### 505 **Ligand Binding Assays**

506 The dissociation constant, ( $K_d$ ) of estradiol binding to each ER was measured by saturation  
507 binding with [<sup>3</sup>H]17 $\beta$ -E<sub>2</sub> and Scatchard plot analysis [42], as described previously [8, 43].

508 Relative binding affinities (RBA) were determined by a competitive radiometric ligand binding  
509 assay with 2 nM [<sup>3</sup>H]E2 as tracer [8]. Incubations were at 0 °C for 18–24 hr. Hydroxyapatite was  
510 used to adsorb the receptor-ligand complex, and unbound ligand was washed away. The  
511 determination of the RBA values is reproducible in independent experiments with a CV of 0.3,  
512 and the values shown represent the average ± range or SD of two or more separate  
513 determinations.  $K_i$  was determined by the Cheng-Prusoff equation [33]  $K_i = IC_{50}/(1 + [\text{tracer}$   
514  $\text{total}/K_d \text{ of tracer}])$ .

### 515 **Hydrogen/Deuterium Exchange-Mass Spectrometry (HDX-MS)**

516 Solution-phase amide HDX experiments were carried out with a fully automated system (CTC  
517 HTS PAL, LEAP Technologies, Carrboro, NC; housed inside a 4°C cabinet) as described  
518 previously [8] with slight modifications.

519 *Peptide Identification.* Peptides were identified using tandem MS ( $MS^2$  or MS/MS) experiments  
520 performed with a LTQ linear ion trap mass spectrometer (LTQ Orbitrap XL with ETD,  
521 ThermoFisher, San Jose, CA) over a 70 min gradient. Product ion spectra were acquired in a  
522 data-dependent mode and the five most abundant ions were selected for the product ion analysis  
523 per scan event. The MS/MS \*.raw data files were converted to \*.mgf files and then submitted to  
524 MASCOT ver2.3 (Matrix Science, London, UK) for peptide identification. The maximum  
525 number of missed cleavage was set at 4 with the mass tolerance for precursor ions +/- 0.6 Da and  
526 for fragment ions +/- 8ppm. Oxidation to Methionine was selected for variable modification.  
527 Pepsin was used for digestion and no specific enzyme was selected in the MASCOT during the  
528 search. Peptides included in the peptide set used for HDX detection had a MASCOT score of 20  
529 or greater. The MS/MS MASCOT search was also performed against a decoy (reverse) sequence

530 and false positives were ruled out. The MS/MS spectra of all the peptide ions from the MASCOT  
531 search were further manually inspected and only the unique charged ions with the highest  
532 MASCOT score were used in estimating the sequence coverage and included in HDX peptide  
533 set.

534 *HDX-MS analysis.* For differential HDX experiments, 5  $\mu\text{L}$  of a 10  $\mu\text{M}$  ER $\alpha$  LBD (Apo or in  
535 complex with 10-fold excess compound) was diluted to 25  $\mu\text{L}$  with D<sub>2</sub>O-containing HDX buffer  
536 (20 mM Tris-HCl pH 8.0, 150 mM NaCl, 5% glycerol, 1 mM DTT) and incubated at 4 °C for 10  
537 s, 30 s, 60 s, 900 s, and 3600 s. Following on-exchange, unwanted forward or backward  
538 exchange is minimized, and the protein is denatured by dilution to 50  $\mu\text{L}$  with 0.1% TFA in 5 M  
539 urea with 50mM TCEP (held at 4 °C, pH 2.5). Samples are then passed across an immobilized  
540 pepsin column (prepared in house) at 50  $\mu\text{L min}^{-1}$  (0.1% TFA, 15 °C), and the resulting peptides  
541 are trapped onto a C<sub>8</sub> trap cartridge (Thermo Fisher, Hypersil Gold). Peptides were then gradient  
542 eluted (5% CH<sub>3</sub>CN to 50% CH<sub>3</sub>CN, 0.3% formic acid over 6 min, 4 °C) across a 1mm  $\times$  50 mm  
543 C<sub>18</sub> analytical column (Hypersil Gold, Thermo Fisher) and electrosprayed directly into a high  
544 resolution orbitrap mass spectrometer (LTQ Orbitrap XL with ETD, Thermo Fisher). Percent  
545 deuterium exchange values for peptide isotopic envelopes at each time point were calculated and  
546 processed using HDX Workbench [44]. Each HDX experiment was carried out in triplicate with  
547 a single preparation of each protein-ligand complex. The intensity weighted mean m/z  
548 centroid value of each peptide envelope was calculated and subsequently converted into a  
549 percentage of deuterium incorporation. This is accomplished by determining the observed  
550 averages of the undeuterated and using the conventional formula described elsewhere  
551 [45]. Statistical significance for the differential HDX data is determined by an unpaired t-test for  
552 each time point, a procedure that is integrated into the HDX Workbench software

553 [44]. Corrections for back-exchange were made on the basis of an estimated 70% deuterium  
554 recovery and accounting for 80% final deuterium concentration in the sample (1:5 dilution in  
555 D<sub>2</sub>O HDX buffer).

### 556 **X-ray Crystallographic Analysis of the WT ER $\alpha$ LBD-BZA Complex**

557 The 6 $\times$ His-TEV-tagged ER $\alpha$ -L372S, L536S double mutant LBD was expressed in *E.coli*  
558 BL21(DE3) and purified as described [46]. LBD (10 mg/mL) and incubated with 1 mM BZA  
559 overnight at 4 °C. LBD-BZA was crystallized using vapor diffusion by hanging drop in 33%  
560 PEG 3,350, 100 mM Tris pH 6.6, and 250 mM MgCl<sub>2</sub>. Diffraction data were collected at the  
561 Canadian Light Source at beamline 08ID-1 at a wavelength of 0.97 Å. Indexing, scaling, and  
562 structure refinement were performed as described [8]. **Supplemental Table 1** shows data  
563 collection and refinement statistics. Final coordinates were deposited in the Protein Databank  
564 with the accession code 4XI3.

### 565 **Quantum Mechanical Calculations**

566 Torsion scans were performed on the bond connecting the internal substituents to the central core  
567 for each ligand. The ligand coordinates were extracted from x-ray crystal structures of BZA  
568 (PDB code 4XI3) and RAL (PDB code 2QXS) and all hydrogens were added. Relaxed potential  
569 energy surface scans in which the remainder of the structure is geometry optimized at each  
570 torsion step were prepared and analyzed using the torsion scan module of the Force Field Toolkit  
571 [47] (ffTK) plugin of VMD [48]. Quantum mechanical calculations were performed using  
572 Gaussian G09 [49] at the MP2 level of theory with a 6-31G\* basis set. Both ligands were  
573 scanned using a bidirection technique originating from the crystal structure conformation and  
574 scanning outward in the (+) and (-) directions independently. The BZA ligand was scanned in 4-

575 degree increments while the RAL ligand required a smaller 2-degree step size to avoid  
576 discontinuities due to broader conformational changes when taking larger steps.

### 577 **Molecular Dynamics Simulations**

578 *Ligand parameterization.* A 3D structure of BZA (without hydrogen atoms) was first built using  
579 the computer program GaussView (version 4.1.2; part of the computer program Gaussian 03  
580 [50]). The remaining ligand parameterization was carried out as described [8].

581 *Structure preparation, molecular dynamics, data visualization and analysis.* WT-BZA (PDB:  
582 4XI3) was used as a template to construct starting structures of Y537S-BZA and D538G-BZA.  
583 Specifically, chains A and C were chosen among the three dimers in 4XI3 for having the least  
584 missing residues in the loop H11-12 region, with ions removed and water molecules retained.  
585 Side chain atoms of mutation sites (residue 537 and 538, respectively) were also replaced with  
586 the mutant residues. Otherwise, structures were prepared, molecular dynamics were calculated,  
587 and data were analyzed/visualized as described [8].

588

589

590

591

592

593

594

595 **Acknowledgements**

596 Special thanks to Dr. Richard Walter and James Gorin for assistance with structure data  
597 collection. The Canadian Light Source is supported by the Canada Foundation for Innovation,  
598 Natural Sciences and Engineering Research Council of Canada, the University of Saskatchewan,  
599 the Government of Saskatchewan, Western Economic Diversification Canada, the National  
600 Research Council Canada, and the Canadian Institutes of Health Research. Research reported in  
601 this publication was supported by the Susan G. Komen Foundation (S.W.F), Department of  
602 Defense Breakthrough Award (G.L.G and S.C.), The Virginia and D.K. Ludwig Fund for Cancer  
603 Research (GLG), National Institute of General Medical Sciences of the National Institutes of  
604 Health under Award Number R35GM124952 (Y.S.) and by the National Science Foundation  
605 under Award Number CCF-1546278 (Y.S.). The content is solely the responsibility of the  
606 authors and does not necessarily represent the official views of the National Institutes of Health  
607 or the National Science Foundation. Portions of MD simulations were conducted with high  
608 performance research computing resources provided by Texas A&M University  
609 (<http://hprc.tamu.edu/>).

610

611

612

613

614

615

## 616 **References Cited**

- 617 1. Frasor, J., et al., *Selective Estrogen Receptor Modulators*. Cancer Research, 2004. **64**(4): p. 1522.
- 618 2. Toy, W., et al., *ESR1 ligand-binding domain mutations in hormone-resistant breast cancer*. Nat
- 619 Genet, 2013. **45**(12): p. 1439-45.
- 620 3. Shang, Y. and M. Brown, *Molecular Determinants for the Tissue Specificity of SERMs*. Science,
- 621 2002. **295**(5564): p. 2465.
- 622 4. Jeselsohn, R., et al., *ESR1 mutations-a mechanism for acquired endocrine resistance in breast*
- 623 *cancer*. Nat Rev Clin Oncol, 2015. **12**(10): p. 573-83.
- 624 5. Jeselsohn, R., et al., *Emergence of constitutively active estrogen receptor-alpha mutations in*
- 625 *pretreated advanced estrogen receptor-positive breast cancer*. Clin Cancer Res, 2014. **20**(7): p.
- 626 1757-67.
- 627 6. Niu, J., et al., *Incidence and clinical significance of ESR1 mutations in heavily pretreated*
- 628 *metastatic breast cancer patients*. Onco Targets Ther, 2015. **8**: p. 3323-8.
- 629 7. Nettles, K.W., et al., *NFkappaB selectivity of estrogen receptor ligands revealed by comparative*
- 630 *crystallographic analyses*. Nat Chem Biol, 2008. **4**(4): p. 241-7.
- 631 8. Fanning, S.W., Mayne, C.G., Dharmarajan, V., Carlson, K.E., Martin, T.A., Novick, S.J., Toy, W.,
- 632 Green, B., Panchamukhi, S., Katzenellenbogen, B.S., Tajkhorshid, E., Griffin, P.R., Shen, Y.,
- 633 Chandarlapaty, S., Katzenellenbogen, J.A., Greene, G.L., *Estrogen Receptor Alpha Somatic*
- 634 *Mutations Y537S and D538G Confer Breast Cancer Endocrine Resistance by Stabilizing the*
- 635 *Activating Function-2 Binding Conformation*. eLife, 2016.
- 636 9. Wardell, S.E., et al., *Bazedoxifene exhibits antiestrogenic activity in animal models of tamoxifen-*
- 637 *resistant breast cancer: implications for treatment of advanced disease*. Clin Cancer Res, 2013.
- 638 **19**(9): p. 2420-31.
- 639 10. Garner, F., et al., *RAD1901: a novel, orally bioavailable selective estrogen receptor degrader that*
- 640 *demonstrates antitumor activity in breast cancer xenograft models*. Anticancer Drugs, 2015.
- 641 **26**(9): p. 948-56.
- 642 11. van Kruchten, M., et al., *Measuring Residual Estrogen Receptor Availability during Fulvestrant*
- 643 *Therapy in Patients with Metastatic Breast Cancer*. Cancer Discovery, 2015. **5**(1): p. 72.
- 644 12. Lai, A., et al., *Identification of GDC-0810 (ARN-810), an Orally Bioavailable Selective Estrogen*
- 645 *Receptor Degradar (SERD) that Demonstrates Robust Activity in Tamoxifen-Resistant Breast*
- 646 *Cancer Xenografts*. J Med Chem, 2015. **58**(12): p. 4888-904.
- 647 13. De Savi, C., et al., *Optimization of a Novel Binding Motif to (E)-3-(3,5-Difluoro-4-((1R,3R)-2-(2-*
- 648 *fluoro-2-methylpropyl)-3-methyl-2,3,4,9-tetra hydro-1H-pyrido[3,4-b]indol-1-yl)phenyl)acrylic*
- 649 *Acid (AZD9496), a Potent and Orally Bioavailable Selective Estrogen Receptor Downregulator*
- 650 *and Antagonist*. J Med Chem, 2015. **58**(20): p. 8128-40.
- 651 14. Toy, W., et al., *Activating ESR1 Mutations Differentially Affect the Efficacy of ER Antagonists*.
- 652 Cancer Discov, 2016.
- 653 15. Tikoo, D. and M. Gupta, *Duavee: a tissue-selective estrogen complex for menopausal symptoms*
- 654 *and prevention of osteoporosis*. International Journal of Basic & Clinical Pharmacology, 2015.
- 655 **4**(2): p. 391.
- 656 16. Komm, B.S., et al., *Bazedoxifene acetate: a selective estrogen receptor modulator with improved*
- 657 *selectivity*. Endocrinology, 2005. **146**(9): p. 3999-4008.
- 658 17. Lewis-Wambi, J.S., et al., *The Selective Estrogen Receptor Modulator Bazedoxifene Inhibits*
- 659 *Hormone-Independent Breast Cancer Cell Growth and Down-Regulates Estrogen Receptor  $\alpha$  and*
- 660 *Cyclin D1*. Molecular Pharmacology, 2011. **80**(4): p. 610-620.



- 661 18. Biskobing, D.M., *Update on bazedoxifene: a novel selective estrogen receptor modulator*. Clin  
662 Interv Aging, 2007. **2**(3): p. 299-303.
- 663 19. Dean, J.L., et al., *Therapeutic CDK4/6 inhibition in breast cancer: key mechanisms of response*  
664 *and failure*. Oncogene, 2010. **29**(28): p. 4018-4032.
- 665 20. Wardell, S.E., et al., *Efficacy of SERD/SERM Hybrid-CDK4/6 Inhibitor Combinations in Models of*  
666 *Endocrine Therapy-Resistant Breast Cancer*. Clinical Cancer Research, 2015. **21**(22): p. 5121.
- 667 21. Yang, C., et al., *Acquired CDK6 amplification promotes breast cancer resistance to CDK4/6*  
668 *inhibitors and loss of ER signaling and dependence*. Oncogene, 2017. **36**(16): p. 2255-2264.
- 669 22. *Tamoxifen for early breast cancer: an overview of the randomised trials*. Early Breast Cancer  
670 *Trialists' Collaborative Group*. (0140-6736 (Print)).
- 671 23. Lipton, A., et al., *Randomized Trial of Aminoglutethimide & versus & Tamoxifen in Metastatic Breast Cancer*. Cancer Research, 1982. **42**(8 Supplement): p. 3434s.
- 672 24. Allred, D.C., et al., *Adjuvant tamoxifen reduces subsequent breast cancer in women with*  
673 *estrogen receptor-positive ductal carcinoma in situ: a study based on NSABP protocol B-24*.  
674 (1527-7755 (Electronic)).
- 675 25. Visvanathan, K., et al., *American society of clinical oncology clinical practice guideline update on*  
676 *the use of pharmacologic interventions including tamoxifen, raloxifene, and aromatase inhibition*  
677 *for breast cancer risk reduction*. (1527-7755 (Electronic)).
- 678 26. Messalli, E.M. and C. Scaffa, *Long-term safety and efficacy of raloxifene in the prevention and*  
679 *treatment of postmenopausal osteoporosis: an update*. International Journal of Women's  
680 Health, 2009. **1**: p. 11-20.
- 681 27. Cauley, J.A., et al., *Continued breast cancer risk reduction in postmenopausal women treated*  
682 *with raloxifene: 4-year results from the MORE trial*. Multiple outcomes of raloxifene evaluation.  
683 (0167-6806 (Print)).
- 684 28. Howell, A., et al., *Comparison of Fulvestrant Versus Tamoxifen for the Treatment of Advanced*  
685 *Breast Cancer in Postmenopausal Women Previously Untreated With Endocrine Therapy: A*  
686 *Multinational, Double-Blind, Randomized Trial*. Journal of Clinical Oncology, 2004. **22**(9): p.  
687 1605-1613.
- 688 29. Osborne, C.K., et al., *Double-blind, randomized trial comparing the efficacy and tolerability of*  
689 *fulvestrant versus anastrozole in postmenopausal women with advanced breast cancer*  
690 *progressing on prior endocrine therapy: results of a North American trial*. 2002(0732-183X  
691 (Print)).
- 692 30. Howell, A., et al., *Fulvestrant, formerly ICI 182,780, is as effective as anastrozole in*  
693 *postmenopausal women with advanced breast cancer progressing after prior endocrine*  
694 *treatment*. 2002(0732-183X (Print)).
- 695 31. Horwitz, K.B., Y. Koseki, and W.L. McGuire, *Estrogen Control of Progesterone Receptor in Human*  
696 *Breast Cancer: Role of Estradiol and Antiestrogen\**. Endocrinology, 1978. **103**(5): p. 1742-1751.
- 697 32. Liao, L., et al., *Molecular structure and biological function of the cancer-amplified nuclear*  
698 *receptor coactivator SRC-3/AIB1*. The Journal of Steroid Biochemistry and Molecular Biology,  
699 2002. **83**(1-5): p. 3-14.
- 700 33. Yung-Chi Cheng, W.H.P., *Relationship between the inhibition constant ( $K_i$ ) and the concentration*  
701 *of inhibitor which causes 5- per cent inhibition ( $I_{50}$ ) of an enzymatic reaction*. Biochemical  
702 Pharmacology, 1973. **22**: p. 3099-3108.
- 703 34. Lewis-Wambi, J.S., et al., *The selective estrogen receptor modulator bazedoxifene inhibits*  
704 *hormone-independent breast cancer cell growth and down-regulates estrogen receptor alpha*  
705 *and cyclin D1*. Mol Pharmacol, 2011. **80**(4): p. 610-20.
- 706

- 707 35. Sonoda, M.T., et al., *Ligand dissociation from estrogen receptor is mediated by receptor*  
708 *dimerization: evidence from molecular dynamics simulations*. Molecular endocrinology  
709 (Baltimore, Md.), 2008. **22**(7): p. 1565-1578.
- 710 36. Koppen, A., et al., *Nuclear receptor-coregulator interaction profiling identifies TRIP3 as a novel*  
711 *peroxisome proliferator-activated receptor gamma cofactor*. Mol Cell Proteomics, 2009. **8**(10): p.  
712 2212-26.
- 713 37. Tamrazi, A., et al., *Estrogen Receptor Dimerization: Ligand Binding Regulates Dimer Affinity and*  
714 *DimerDissociation Rate*. Molecular Endocrinology, 2002. **16**(12): p. 2706-2719.
- 715 38. Kim, S.H., et al., *A Proteomic Microarray Approach for Exploring Ligand-initiated Nuclear*  
716 *Hormone Receptor Pharmacology, Receptor Selectivity, and Heterodimer Functionality*.  
717 Molecular & Cellular Proteomics, 2005. **4**(3): p. 267-277.
- 718 39. Tamrazi, A., et al., *Coactivator Proteins as Determinants of Estrogen Receptor Structure and*  
719 *Function: Spectroscopic Evidence for a Novel Coactivator-Stabilized Receptor Conformation*.  
720 Molecular Endocrinology, 2005. **19**(6): p. 1516-1528.
- 721 40. Moore, T.W., J.R. Gunther, and J.A. Katzenellenbogen, *Estrogen receptor alpha/co-activator*  
722 *interaction assay - TR-FRET*. Methods in molecular biology (Clifton, N.J.), 2015. **1278**: p. 545-553.
- 723 41. Jeyakumar, M., et al., *Exploration of Dimensions of Estrogen Potency: PARSING LIGAND BINDING*  
724 *AND COACTIVATOR BINDING AFFINITIES*. The Journal of Biological Chemistry, 2011. **286**(15): p.  
725 12971-12982.
- 726 42. Scatchard, G., *THE ATTRACTIONS OF PROTEINS FOR SMALL MOLECULES AND IONS*. Annals of the  
727 New York Academy of Sciences, 1949. **51**(4): p. 660-672.
- 728 43. Hurth, K.M., et al., *Ligand-Induced Changes in Estrogen Receptor Conformation As Measured by*  
729 *Site-Directed Spin Labeling*. Biochemistry, 2004. **43**(7): p. 1891-1907.
- 730 44. Pascal, B.D., et al., *HDX Workbench: Software for the Analysis of H/D Exchange MS Data*. Journal  
731 of the American Society for Mass Spectrometry, 2012. **23**(9): p. 10.1007/s13361-012-0419-6.
- 732 45. Zhang, Z. and D.L. Smith, *Determination of amide hydrogen exchange by mass spectrometry: a*  
733 *new tool for protein structure elucidation*. Protein Science : A Publication of the Protein Society,  
734 1993. **2**(4): p. 522-531.
- 735 46. Sharma, N., et al., *Exploring the Structural Compliancy versus Specificity of the Estrogen Receptor*  
736 *Using Isomeric Three-Dimensional Ligands*. ACS Chemical Biology, 2017. **12**(2): p. 494-503.
- 737 47. Mayne, C.G., et al., *Rapid parameterization of small molecules using the Force Field Toolkit*.  
738 Journal of computational chemistry, 2013. **34**(32): p. 10.1002/jcc.23422.
- 739 48. Humphrey, W., A. Dalke, and K. Schulten, *VMD: Visual molecular dynamics*. Journal of Molecular  
740 Graphics, 1996. **14**(1): p. 33-38.
- 741 49. Frisch, M.J., et al., *Gaussian 09, Revision E.01*. 2009: Wallingford CT.
- 742 50. Frisch, M.J., et al., *Gaussian 03, Revision C.02*.
- 743 51. Zhao, Y., et al., *Structurally Novel Antiestrogens Elicit Differential Responses from Constitutively*  
744 *Active Mutant Estrogen Receptors in Breast Cancer Cells and Tumors*. Cancer Research, 2017.  
745 **77**(20): p. 5602.

746

747

748

749

|  |  |  |
|--|--|--|
|  |  |  |
|  |  |  |
|  |  |  |
|  |  |  |
|  |  |  |

751

752

753

754

755

756

757

758

759

760

761

762

763

764

765

766

767

768

769

770 **Supplementary Figures**

|                                   | ER $\alpha$ LBD-<br>BZA |
|-----------------------------------|-------------------------|
| Data Collection                   |                         |
| Space Group                       | P1                      |
| a, b, c (Å)                       | 53.57, 59.17,<br>94.14  |
| $\alpha$ , $\beta$ , $\gamma$ (°) | 86.76, 75.36,<br>63.03  |
| Resolution Range                  | 50-2.49                 |
| Number of                         |                         |

|                                  |               |
|----------------------------------|---------------|
| Reflections                      |               |
| (all/unique)                     | 63,978/29,080 |
| I/ $\sigma$ (highest resolution) | 1.35          |
| R <sub>merge</sub>               | 8.0           |
| Completeness (%)                 | 97.6          |
| Redundancy                       | 2.2           |
| Refinement                       |               |
| Rwork/Rfree                      | 21.1/29.3     |
| No. Residues/Chain               |               |
| ER $\alpha$ LBD D538G            | 241           |
| GRIP Peptide                     | 0             |
| Water                            | 5             |
| Ligand                           | 1             |
| RMSD                             |               |
| Bond lengths (Å)                 | 0.010         |
| Bond angles (°)                  | 1.575         |
| Chiral volume                    | 0.1016        |
| Ramachandran plot statistics     |               |
| Preferred number (%)             | 837 (97.44%)  |
| Additional allowed (%)           | 18 (2.10%)    |
| Outliers (%)                     | 4 (0.47%)     |

771 **Supplemental Table 1:** Crystallographic data collection and refinement statistics.

772

773

774

775

776

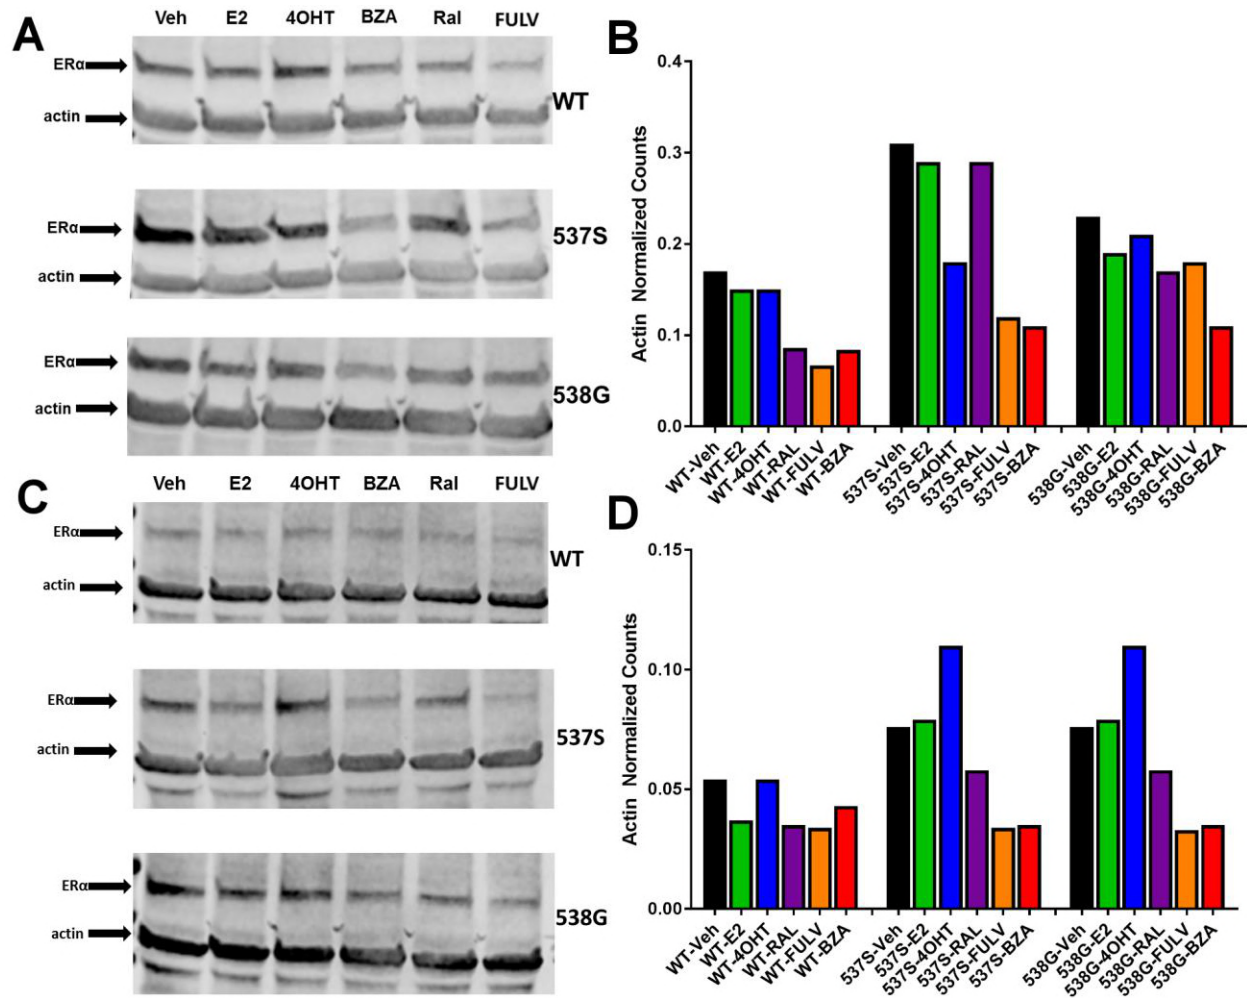

777

778 **Supplemental Figure 1:** Replicate experiments of HA-ERα levels in MCF-7 cells upon treatment with  
 779 E2, 4-OHT, RAL, fulvestrant (FULV), or BZA for 24 hours. A) Replicate immunoblot to that shown in  
 780 **Figure 1** probing for HA-ERα and actin in MCF-7 cells upon treatment. B) Counts from immunoblot A  
 781 normalized to actin. C) Third replicate immunoblot to that shown in **Figure 1** probing for HA-ERα and  
 782 actin in MCF-7 cells upon treatment. D) Counts from immunoblot C normalized to actin.

783

784

785

786

787 **Supplemental Table 2:** Ligand binding affinities for WT, Y537S, and D538G mutant ERα LBD..

| Ligand/Mutant         | $K_d$ (nM) <sup>a</sup> |             |             |
|-----------------------|-------------------------|-------------|-------------|
|                       | WT                      | Y537S       | D538G       |
| <b>E<sub>2</sub>*</b> | 0.22 ± 0.11             | 1.40 ± 0.54 | 1.77 ± 0.66 |
|                       | $K_i$ (nM) <sup>b</sup> |             |             |
| <b>4-OHT*</b>         | 0.12 ± 0.003            | 2.64 ± 0.4  | 3.28 ± 0.7  |
| <b>RAL</b>            | 0.30 ± 0.05             | 3.59 ± 1.0  | 3.77 ± 1.0  |
| <b>BZA</b>            | 0.37 ± 0.01             | 3.50 ± 0.6  | 5.53 ± 0.7  |
| <b>Fulvestrant*</b>   | 0.13 ± 0.03             | 3.68 ± 0.8  | 5.06 ± 1.2  |

788  
789  
790  
791  
792  
793  
794  
795  
796  
797  
798  
799  
800  
801  
802  
803  
804  
805

<sup>a</sup> Measured directly by Scatchard Analysis using [<sup>3</sup>H]E<sub>2</sub>.

<sup>b</sup> Calculated using the Cheng-Prusoff equation from the IC<sub>50</sub> values determined in a competitive radiometric binding analysis using [<sup>3</sup>H]E<sub>2</sub> as a tracer.

\*Indicates previously published data [8, 51].

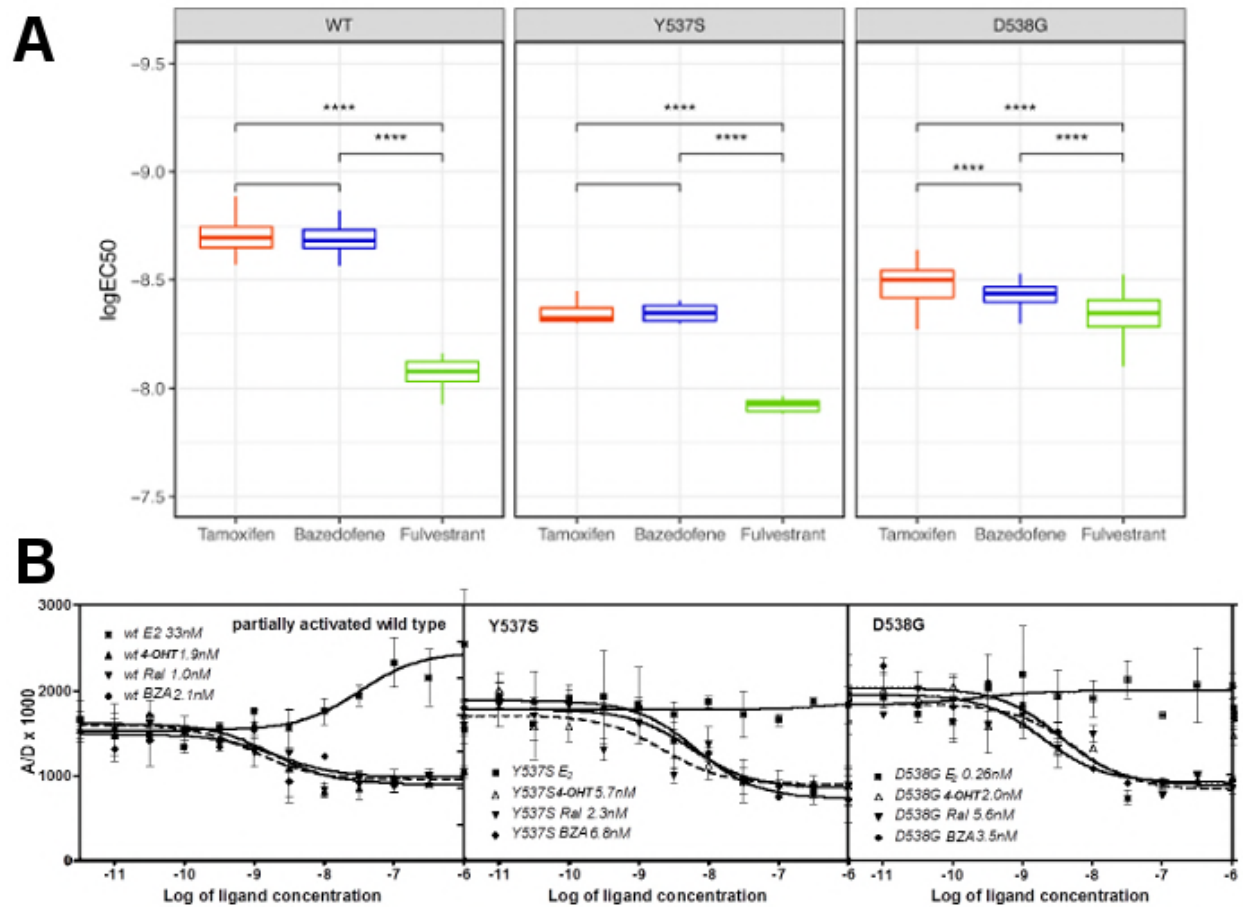

806

807 **Supplemental Figure 2: Coactivator recruitment and inhibition of WT, Y537S, and D538G ERα LBD.**  
 808 **A)** EC<sub>50</sub> quartiles for cells treated with 4-OHT (red), BZA (blue), or FULV (green). **B)** *In vitro*  
 809 quantification of the effect of ligands on promoting (E<sub>2</sub>) or inhibiting (4-OHT, RAL, BZA) the binding of  
 810 SRC3-NRD to recombinant expressed WT, Y537S, or D538G ERα LBD. To be able to measure a signal  
 811 from all three receptors, they were first primed with 20 nME<sub>2</sub> before adding ligand. IC<sub>50</sub> values (nM) are  
 812 shown next to the legend for each protein.

813

814

815

816



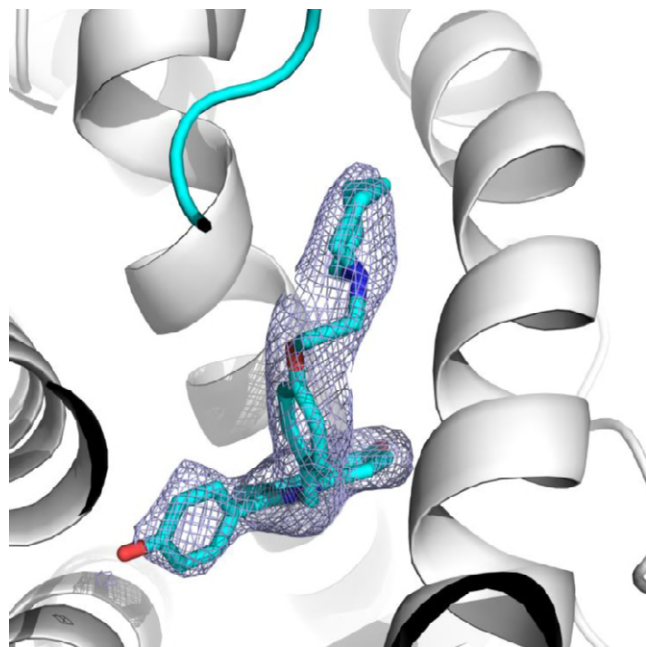

817

818 **Supplemental Figure 3: 2 | Fo-Fc | difference map of BZA in the ER $\alpha$  ligand binding pocket contoured**

819 to 1.5 $\sigma$ .

820

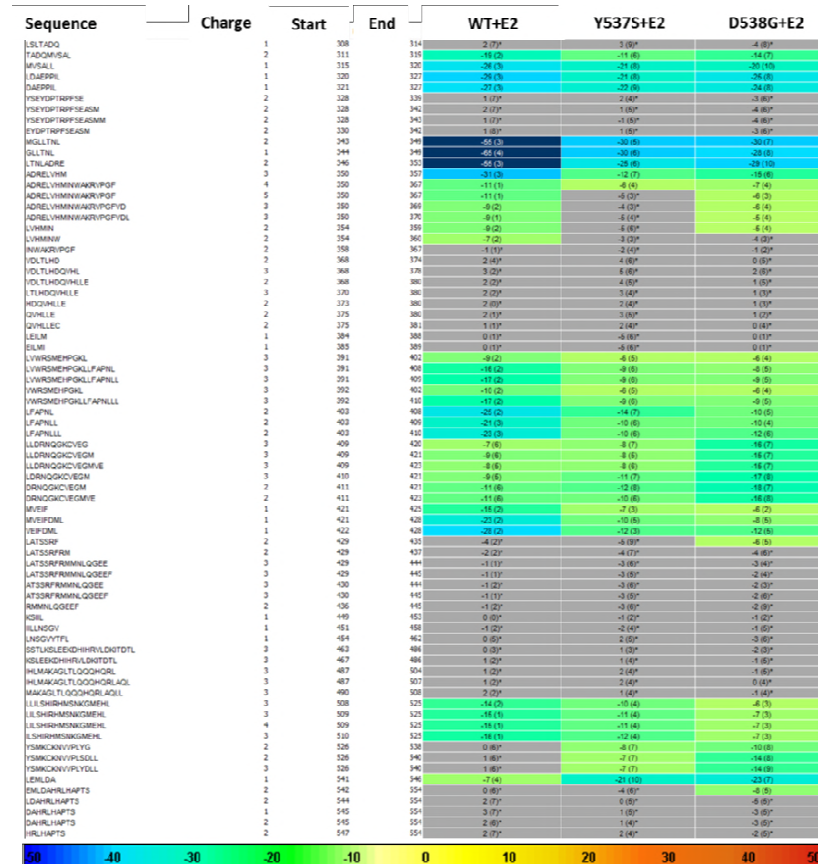

821

822 **Supplemental Figure 4: HDX MS for WT, Y537S, and D538G ERα LBD in complex with E2.**  
 823 Deuterium uptake for each peptide is calculated as the average of % D for the 6 time points (10s,  
 824 30s, 60s, 300s, 900s and 3600s), and the difference in average % D values between the Apo-ERα  
 825 and ERα-E2 bound samples is shown as a heat map with a color code given at the bottom of the  
 826 figure (warm colors for deprotection and cool colors for protection). Peptides are colored only if  
 827 they show a >5% difference (less or more protection) in average deuterium uptake between the  
 828 two states, and the software employs a paired two-tailed student's t-test-based coloring scheme  
 829 (p-value < 0.05 for two consecutive time points or a p-value < 0.01 for a single time point) to  
 830 distinguish real protection differences from inherent variation in the data. Grey color represents  
 831 no significant change (0-5%) between the two states.  
 832

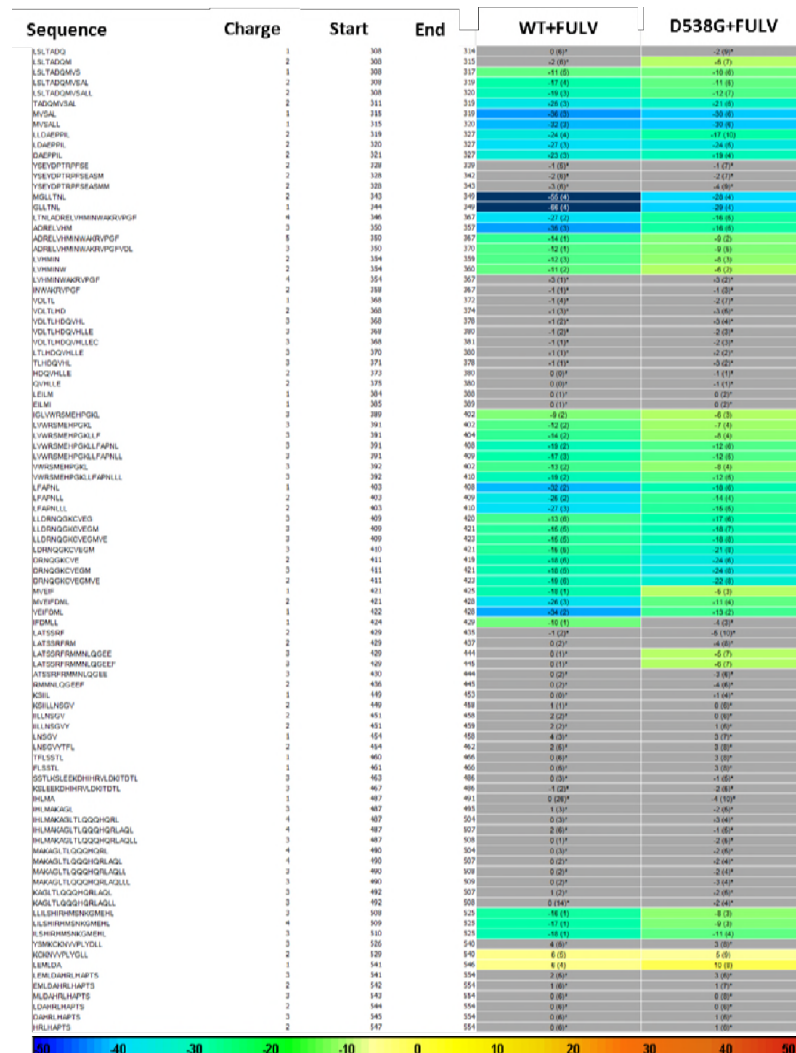

833

834 **Supplemental Figure 5: HDX MS for WT and D538G ERα LBD in complex with FULV.** Deuterium  
 835 uptake for each peptide is calculated as the average of % D for the 6 time points (10s, 30s, 60s, 300s, 900s  
 836 and 3600s) and the difference in average % D values between the Apo-ERα and ERα-FULV bound  
 837 samples is shown as a heat map with a color code given at the bottom of the figure (warm colors for  
 838 deprotection and cool colors for protection). Peptides are colored only if they show a >5% difference (less  
 839 or more protection) in average deuterium uptake between the two states and the software employs a  
 840 paired two-tailed student's t-test-based coloring scheme (p-value < 0.05 for two consecutive time points  
 841 or a p-value < 0.01 for a single time point) to distinguish real protection differences from inherent  
 842 variation in the data. Grey color represents no significant change (0-5%) between the two states.

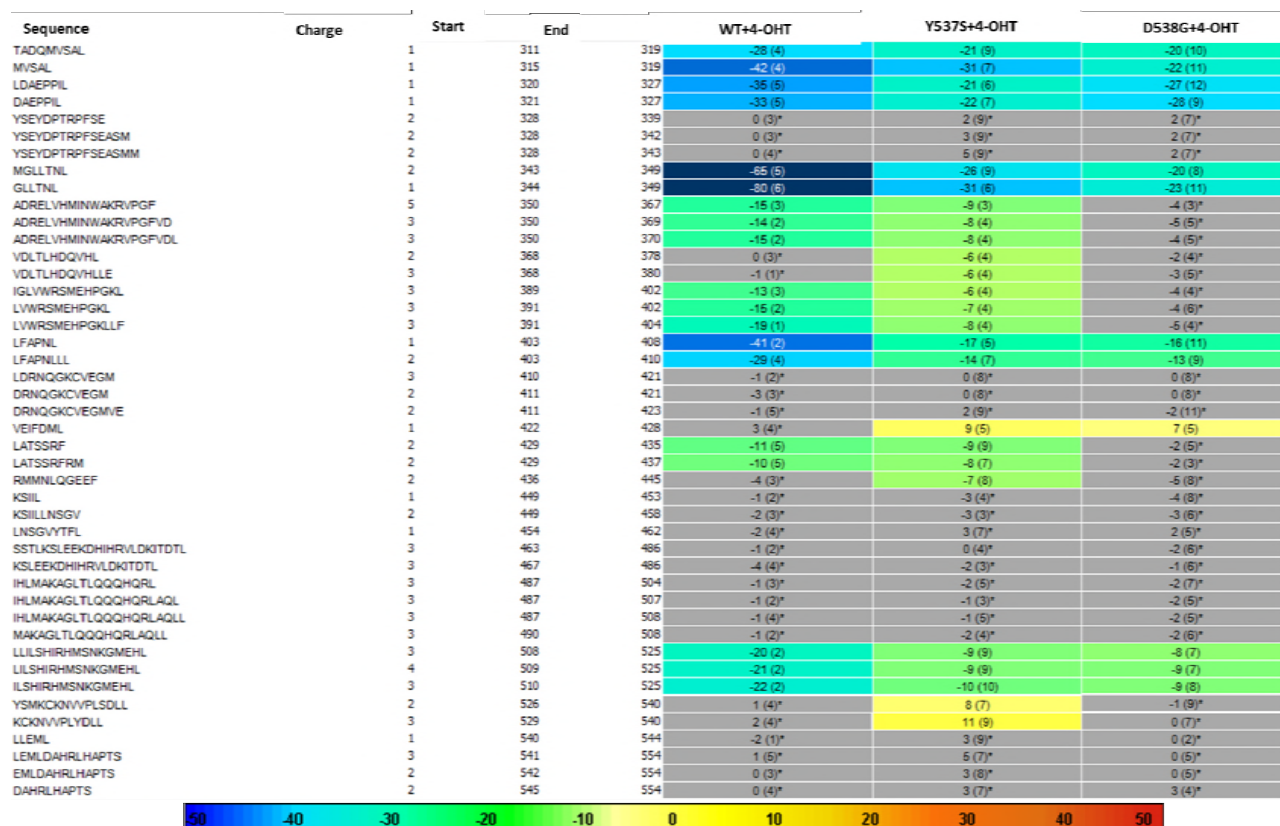

843

844 **Supplemental Figure 6:** HDX MS for WT, Y537S, and D538G ER $\alpha$  LBD in complex with 4-OHT.  
 845 Deuterium uptake for each peptide is calculated as the average of % D for the 6 time points (10s, 30s, 60s,  
 846 300s, 900s and 3600s) and the difference in average % D values between the Apo-ER $\alpha$  and ER $\alpha$ -FULV  
 847 bound samples is shown as a heat map with a color code given at the bottom of the figure (warm colors  
 848 for deprotection and cool colors for protection). Peptides are colored only if they show a >5% difference  
 849 (less or more protection) in average deuterium uptake between the two states and the software employs a  
 850 paired two-tailed student's t-test-based coloring scheme (p-value < 0.05 for two consecutive time points  
 851 or a p-value < 0.01 for a single time point) to distinguish real protection differences from inherent  
 852 variation in the data. Grey color represents no significant change (0-5%) between the two states.

853

854

855

856

857

858

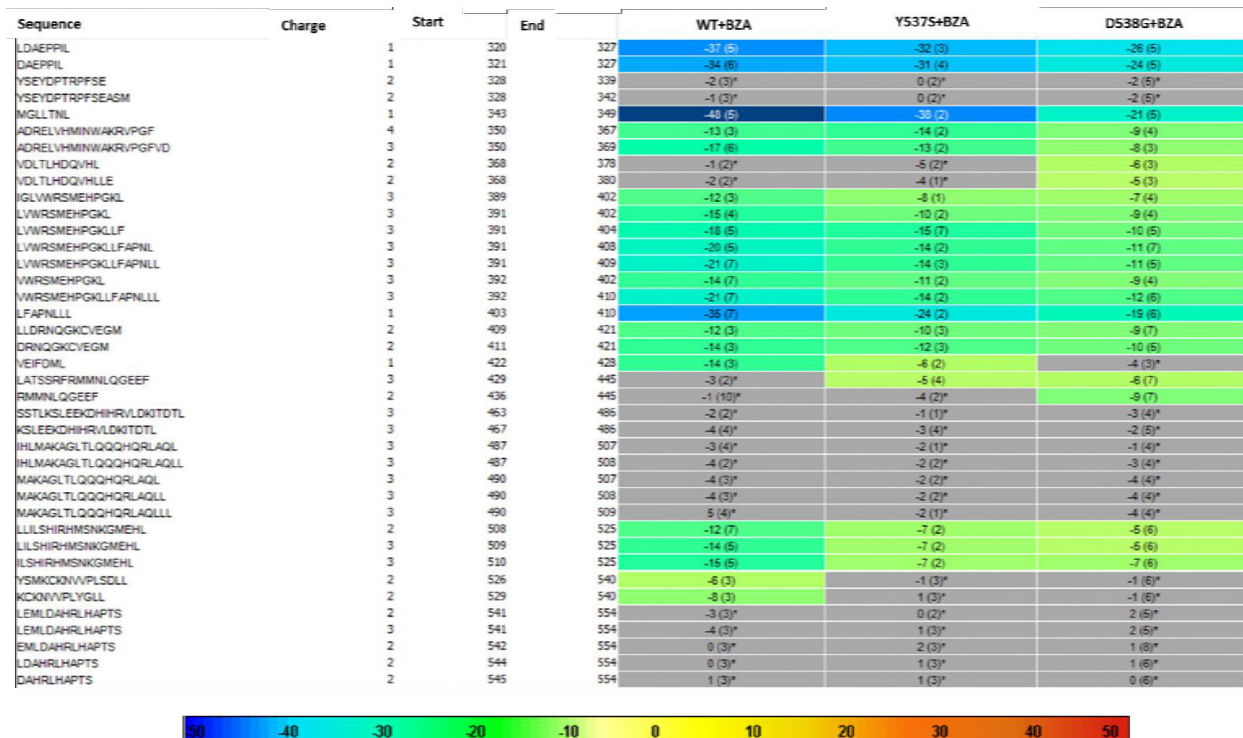

859

860 **Supplemental Figure 7:** HDX MS for WT, Y537S, and D538G ER $\alpha$  LBD in complex with BZA.  
 861 Deuterium uptake for each peptide is calculated as the average of % D for the 6 time points (10s, 30s, 60s,  
 862 300s, 900s and 3600s) and the difference in average % D values between the Apo-ER $\alpha$  and ER $\alpha$ -FULV  
 863 bound samples is shown as a heat map with a color code given at the bottom of the figure (warm colors  
 864 for deprotection and cool colors for protection). Peptides are colored only if they show a >5% difference  
 865 (less or more protection) in average deuterium uptake between the two states and the software employs a  
 866 paired two-tailed student's t-test-based coloring scheme (p-value < 0.05 for two consecutive time points  
 867 or a p-value < 0.01 for a single time point) to distinguish real protection differences from inherent  
 868 variation in the data. Grey color represents no significant change (0-5%) between the two states.

869
